# Supplementary material
Source: publisher figshare collection journal article supplement (https://acs.figshare.com/ndownloader/files/4115938)
Supplement: Supplementary file 1 [file 4115938]

 
data_TIPS-Bpin-BDF 
 
_audit_creation_method            SHELXL-97 
_chemical_name_systematic 
; 
 TIPS-Bpin-BDF 
; 
_chemical_name_common             TIPS-Bpin-BDF 
_chemical_melting_point           ? 
_chemical_formula_moiety          'C40 H68 B2 O6 Si2' 
_chemical_formula_sum 
 'C40 H68 B2 O6 Si2' 
_chemical_formula_weight          722.74 
 
loop_ 
 _atom_type_symbol 
 _atom_type_description 
 _atom_type_scat_dispersion_real 
 _atom_type_scat_dispersion_imag 
 _atom_type_scat_source 
 'C'  'C'   0.0033   0.0016 
 'International Tables Vol C Tables 4.2.6.8 and 6.1.1.4' 
 'H'  'H'   0.0000   0.0000 
 'International Tables Vol C Tables 4.2.6.8 and 6.1.1.4' 
 'B'  'B'   0.0013   0.0007 
 'International Tables Vol C Tables 4.2.6.8 and 6.1.1.4' 
 'O'  'O'   0.0106   0.0060 
 'International Tables Vol C Tables 4.2.6.8 and 6.1.1.4' 
 'Si'  'Si'   0.0817   0.0704 
 'International Tables Vol C Tables 4.2.6.8 and 6.1.1.4' 
 
_symmetry_cell_setting            triclinic 
_symmetry_space_group_name_H-M    'P-1'  
 
loop_ 
 _symmetry_equiv_pos_as_xyz 
 'x, y, z' 
 '-x, -y, -z' 
 
_cell_length_a                    7.7423(18) 
_cell_length_b                    11.828(3) 
_cell_length_c                    12.677(3) 
_cell_angle_alpha                 73.699(7) 
_cell_angle_beta                  86.956(7) 
_cell_angle_gamma                 83.755(7) 
_cell_volume                      1107.3(5) 
_cell_formula_units_Z             1 
_cell_measurement_temperature     293(2) 
_cell_measurement_reflns_used     8053
_cell_measurement_theta_min       6.10 
_cell_measurement_theta_max       55.24 
 
_exptl_crystal_description        'block'
_exptl_crystal_colour             'Colorless' 
_exptl_crystal_size_max           0.6 
_exptl_crystal_size_mid           0.6 
_exptl_crystal_size_min           0.6 
_exptl_crystal_density_meas       ? 
_exptl_crystal_density_diffrn     1.084 
_exptl_crystal_density_method     'not measured' 
_exptl_crystal_F_000              394 
_exptl_absorpt_coefficient_mu     0.120 
_exptl_absorpt_correction_type    none
_exptl_absorpt_correction_T_min   0.8692 
_exptl_absorpt_correction_T_max   0.9100 
_exptl_absorpt_process_details    ? 
 
_exptl_special_details 
; 
 ? 
; 
 
_diffrn_ambient_temperature       293(2) 
_diffrn_radiation_wavelength      0.71075 
_diffrn_radiation_type            MoK\a 
_diffrn_radiation_source          'fine-focus sealed tube' 
_diffrn_radiation_monochromator   graphite 
_diffrn_measurement_device_type   ? 
_diffrn_measurement_method        ? 
_diffrn_detector_area_resol_mean  10.00 
_diffrn_standards_number          ? 
_diffrn_standards_interval_count  ? 
_diffrn_standards_interval_time   ? 
_diffrn_standards_decay_%         ? 
_diffrn_reflns_number             10180 
_diffrn_reflns_av_R_equivalents   0.0251 
_diffrn_reflns_av_sigmaI/netI     0.0319 
_diffrn_reflns_limit_h_min        -9 
_diffrn_reflns_limit_h_max        10 
_diffrn_reflns_limit_k_min        -15 
_diffrn_reflns_limit_k_max        15 
_diffrn_reflns_limit_l_min        -14 
_diffrn_reflns_limit_l_max        16 
_diffrn_reflns_theta_min          3.05 
_diffrn_reflns_theta_max          27.48 
_reflns_number_total              4858 
_reflns_number_gt                 4079 
_reflns_threshold_expression      >2sigma(I) 
 
_computing_data_collection        'PROCESS-AUTO' 
_computing_cell_refinement        'PROCESS-AUTO' 
_computing_data_reduction         'SHELXS-97 (Sheldrick, 1990)'  
_computing_structure_solution     'SHELXS-97 (Sheldrick, 1990)' 
_computing_structure_refinement   'SHELXL-97 (Sheldrick, 1997)' 
_computing_molecular_graphics     ? 
_computing_publication_material   ? 
 
_refine_special_details 
; 
 Refinement of F^2^ against ALL reflections.  The weighted R-factor wR and 
 goodness of fit S are based on F^2^, conventional R-factors R are based 
 on F, with F set to zero for negative F^2^. The threshold expression of 
 F^2^ > 2sigma(F^2^) is used only for calculating R-factors(gt) etc. and is 
 not relevant to the choice of reflections for refinement.  R-factors based 
 on F^2^ are statistically about twice as large as those based on F, and R- 
 factors based on ALL data will be even larger. 
; 
 
_refine_ls_structure_factor_coef  Fsqd  
_refine_ls_matrix_type            full 
_refine_ls_weighting_scheme       calc  
_refine_ls_weighting_details 
 'calc w=1/[\s^2^(Fo^2^)+(0.0870P)^2^+0.4266P] where P=(Fo^2^+2Fc^2^)/3' 
_atom_sites_solution_primary      direct 
_atom_sites_solution_secondary    difmap 
_atom_sites_solution_hydrogens    geom 
_refine_ls_hydrogen_treatment     noref 
_refine_ls_extinction_method      none 
_refine_ls_extinction_coef        ? 
_refine_ls_number_reflns          4858 
_refine_ls_number_parameters      313 
_refine_ls_number_restraints      0 
_refine_ls_R_factor_all           0.0654 
_refine_ls_R_factor_gt            0.0561 
_refine_ls_wR_factor_ref          0.1902 
_refine_ls_wR_factor_gt           0.1826 
_refine_ls_goodness_of_fit_ref    1.194 
_refine_ls_restrained_S_all       1.194 
_refine_ls_shift/su_max           0.000 
_refine_ls_shift/su_mean          0.000 
 
loop_ 
 _atom_site_label 
 _atom_site_type_symbol 
 _atom_site_fract_x 
 _atom_site_fract_y 
 _atom_site_fract_z 
 _atom_site_U_iso_or_equiv 
 _atom_site_adp_type 
 _atom_site_occupancy 
 _atom_site_symmetry_multiplicity 
 _atom_site_calc_flag 
 _atom_site_refinement_flags 
 _atom_site_disorder_assembly 
 _atom_site_disorder_group 
C1 C 0.5370(3) 0.40718(17) -0.05778(15) 0.0366(4) Uani 1 1 d . . . 
C2 C 0.6178(3) 0.51037(17) -0.08148(15) 0.0361(4) Uani 1 1 d . . . 
C3 C 0.5875(3) 0.60130(17) -0.02873(15) 0.0364(4) Uani 1 1 d . . . 
C4 C 0.7064(3) 0.68675(18) -0.08099(17) 0.0414(5) Uani 1 1 d . . . 
H1 H 0.7178 0.7572 -0.0643 0.050 Uiso 1 1 calc R . . 
C5 C 0.7989(3) 0.64610(18) -0.15902(17) 0.0407(4) Uani 1 1 d . . . 
C6 C 1.1669(3) 0.5791(2) -0.2375(2) 0.0590(6) Uani 1 1 d . . . 
H2 H 1.2214 0.5837 -0.1710 0.071 Uiso 1 1 calc R . . 
C7 C 1.1235(4) 0.4533(3) -0.2134(4) 0.0941(12) Uani 1 1 d . . . 
H3 H 1.0663 0.4435 -0.2752 0.141 Uiso 1 1 calc R . . 
H4 H 1.0479 0.4354 -0.1496 0.141 Uiso 1 1 calc R . . 
H5 H 1.2284 0.4007 -0.2000 0.141 Uiso 1 1 calc R . . 
C8 C 1.3057(5) 0.6036(4) -0.3270(4) 0.1078(15) Uani 1 1 d . . . 
H6 H 1.4000 0.5421 -0.3099 0.162 Uiso 1 1 calc R . . 
H7 H 1.3476 0.6785 -0.3322 0.162 Uiso 1 1 calc R . . 
H8 H 1.2576 0.6058 -0.3959 0.162 Uiso 1 1 calc R . . 
C9 C 0.8807(4) 0.7352(3) -0.4023(2) 0.0623(7) Uani 1 1 d . . . 
H9 H 0.9701 0.7703 -0.4554 0.075 Uiso 1 1 calc R . . 
C10 C 0.8333(6) 0.6263(4) -0.4344(3) 0.0941(11) Uani 1 1 d . . . 
H10 H 0.7536 0.5849 -0.3804 0.141 Uiso 1 1 calc R . . 
H11 H 0.9367 0.5746 -0.4379 0.141 Uiso 1 1 calc R . . 
H12 H 0.7800 0.6515 -0.5050 0.141 Uiso 1 1 calc R . . 
C11 C 0.7248(5) 0.8298(4) -0.4136(3) 0.0933(11) Uani 1 1 d . . . 
H13 H 0.6880 0.8549 -0.4884 0.140 Uiso 1 1 calc R . . 
H14 H 0.7582 0.8964 -0.3931 0.140 Uiso 1 1 calc R . . 
H15 H 0.6309 0.7971 -0.3663 0.140 Uiso 1 1 calc R . . 
C12 C 1.0416(3) 0.8375(2) -0.2373(2) 0.0543(6) Uani 1 1 d . . . 
H16 H 0.9326 0.8853 -0.2295 0.065 Uiso 1 1 calc R . . 
C13 C 1.1354(5) 0.8154(3) -0.1301(3) 0.0884(10) Uani 1 1 d . . . 
H17 H 1.2462 0.7716 -0.1344 0.133 Uiso 1 1 calc R . . 
H18 H 1.0670 0.7708 -0.0706 0.133 Uiso 1 1 calc R . . 
H19 H 1.1521 0.8897 -0.1176 0.133 Uiso 1 1 calc R . . 
C14 C 1.1423(5) 0.9144(3) -0.3328(3) 0.0883(11) Uani 1 1 d . . . 
H20 H 1.1662 0.9847 -0.3150 0.132 Uiso 1 1 calc R . . 
H21 H 1.0742 0.9357 -0.3979 0.132 Uiso 1 1 calc R . . 
H22 H 1.2498 0.8709 -0.3456 0.132 Uiso 1 1 calc R . . 
C15 C 0.603(3) 0.1282(14) -0.1703(18) 0.077(6) Uani 0.400(9) 1 d P A 1 
C16 C 0.768(2) 0.0610(12) -0.0970(8) 0.136(8) Uani 0.400(9) 1 d P A 1 
H23 H 0.7278 0.0116 -0.0283 0.204 Uiso 0.400(9) 1 calc PR A 1 
H24 H 0.8359 0.1185 -0.0833 0.204 Uiso 0.400(9) 1 calc PR A 1 
H25 H 0.8383 0.0130 -0.1358 0.204 Uiso 0.400(9) 1 calc PR A 1 
C17 C 0.495(3) 0.0577(15) -0.1888(16) 0.144(9) Uani 0.400(9) 1 d P A 1 
H26 H 0.4559 0.0077 -0.1200 0.216 Uiso 0.400(9) 1 calc PR A 1 
H27 H 0.5529 0.0096 -0.2321 0.216 Uiso 0.400(9) 1 calc PR A 1 
H28 H 0.3965 0.1043 -0.2276 0.216 Uiso 0.400(9) 1 calc PR A 1 
C18 C 0.679(3) 0.223(3) -0.257(2) 0.059(4) Uani 0.400(9) 1 d P A 1 
C19 C 0.8543(16) 0.2106(12) -0.3120(11) 0.094(4) Uani 0.400(9) 1 d P A 1 
H29 H 0.8695 0.2810 -0.3704 0.141 Uiso 0.400(9) 1 calc PR A 1 
H30 H 0.8621 0.1437 -0.3414 0.141 Uiso 0.400(9) 1 calc PR A 1 
H31 H 0.9433 0.1990 -0.2590 0.141 Uiso 0.400(9) 1 calc PR A 1 
C20 C 0.539(2) 0.2792(13) -0.3510(10) 0.135(7) Uani 0.400(9) 1 d P A 1 
H32 H 0.4268 0.2907 -0.3175 0.203 Uiso 0.400(9) 1 calc PR A 1 
H33 H 0.5343 0.2265 -0.3960 0.203 Uiso 0.400(9) 1 calc PR A 1 
H34 H 0.5722 0.3539 -0.3958 0.203 Uiso 0.400(9) 1 calc PR A 1 
C21 C 0.5678(16) 0.1556(9) -0.1785(11) 0.0550(19) Uani 0.600(9) 1 d P A 2 
C22 C 0.6131(14) 0.0196(6) -0.1345(7) 0.095(3) Uani 0.600(9) 1 d P A 2 
H35 H 0.6981 0.0032 -0.0783 0.143 Uiso 0.600(9) 1 calc PR A 2 
H36 H 0.6591 -0.0114 -0.1936 0.143 Uiso 0.600(9) 1 calc PR A 2 
H37 H 0.5100 -0.0171 -0.1042 0.143 Uiso 0.600(9) 1 calc PR A 2 
C23 C 0.4007(10) 0.1696(9) -0.2468(8) 0.116(4) Uani 0.600(9) 1 d P A 2 
H38 H 0.3087 0.1342 -0.1995 0.174 Uiso 0.600(9) 1 calc PR A 2 
H39 H 0.4246 0.1310 -0.3041 0.174 Uiso 0.600(9) 1 calc PR A 2 
H40 H 0.3663 0.2521 -0.2789 0.174 Uiso 0.600(9) 1 calc PR A 2 
C24 C 0.718(2) 0.2246(18) -0.2399(13) 0.075(5) Uani 0.600(9) 1 d P A 2 
C25 C 0.8917(8) 0.1677(8) -0.1957(10) 0.132(5) Uani 0.600(9) 1 d P A 2 
H41 H 0.8870 0.1480 -0.1169 0.198 Uiso 0.600(9) 1 calc PR A 2 
H42 H 0.9781 0.2218 -0.2236 0.198 Uiso 0.600(9) 1 calc PR A 2 
H43 H 0.9214 0.0971 -0.2185 0.198 Uiso 0.600(9) 1 calc PR A 2 
C26 C 0.718(2) 0.2429(8) -0.3633(7) 0.146(6) Uani 0.600(9) 1 d P A 2 
H44 H 0.8006 0.2975 -0.3982 0.219 Uiso 0.600(9) 1 calc PR A 2 
H45 H 0.6043 0.2741 -0.3906 0.219 Uiso 0.600(9) 1 calc PR A 2 
H46 H 0.7495 0.1685 -0.3792 0.219 Uiso 0.600(9) 1 calc PR A 2 
O1 O 0.74452(19) 0.53816(12) -0.16125(11) 0.0410(3) Uani 1 1 d . . . 
O2 O 0.507(2) 0.2136(12) -0.0969(15) 0.052(3) Uani 0.600(9) 1 d P A 2 
O3 O 0.538(3) 0.1933(18) -0.089(2) 0.044(3) Uani 0.400(9) 1 d P A 1 
O4 O 0.670(2) 0.3379(14) -0.2177(12) 0.059(3) Uani 0.600(9) 1 d P A 1 
O5 O 0.702(3) 0.320(2) -0.2046(19) 0.065(6) Uani 0.400(9) 1 d P A 2 
B1 B 0.5800(3) 0.3121(2) -0.12135(19) 0.0392(5) Uani 1 1 d . . . 
Si1 Si 0.97677(7) 0.69831(5) -0.26202(5) 0.0407(2) Uani 1 1 d . . . 
 
loop_ 
 _atom_site_aniso_label 
 _atom_site_aniso_U_11 
 _atom_site_aniso_U_22 
 _atom_site_aniso_U_33 
 _atom_site_aniso_U_23 
 _atom_site_aniso_U_13 
 _atom_site_aniso_U_12 
C1 0.0413(10) 0.0351(9) 0.0357(9) -0.0144(7) 0.0098(7) -0.0067(8) 
C2 0.0388(10) 0.0369(9) 0.0340(9) -0.0132(7) 0.0110(7) -0.0066(8) 
C3 0.0408(10) 0.0332(9) 0.0368(9) -0.0130(7) 0.0089(7) -0.0065(8) 
C4 0.0476(11) 0.0359(10) 0.0428(11) -0.0147(8) 0.0136(8) -0.0104(8) 
C5 0.0460(11) 0.0372(10) 0.0406(10) -0.0131(8) 0.0117(8) -0.0111(8) 
C6 0.0493(13) 0.0597(15) 0.0671(16) -0.0199(12) 0.0110(11) -0.0014(11) 
C7 0.0612(18) 0.0569(18) 0.160(4) -0.028(2) 0.002(2) 0.0052(15) 
C8 0.072(2) 0.102(3) 0.122(3) -0.005(2) 0.047(2) 0.016(2) 
C9 0.0639(15) 0.0825(19) 0.0410(12) -0.0136(11) 0.0075(10) -0.0221(14) 
C10 0.113(3) 0.121(3) 0.065(2) -0.043(2) -0.0070(18) -0.035(2) 
C11 0.081(2) 0.116(3) 0.072(2) -0.0084(19) -0.0198(17) -0.001(2) 
C12 0.0516(13) 0.0496(13) 0.0636(15) -0.0164(10) 0.0080(10) -0.0154(10) 
C13 0.103(3) 0.087(2) 0.089(2) -0.0353(19) -0.0194(19) -0.032(2) 
C14 0.090(2) 0.070(2) 0.106(3) -0.0179(18) 0.0275(19) -0.0434(18) 
C15 0.128(13) 0.030(7) 0.074(7) -0.031(6) 0.056(7) 0.003(6) 
C16 0.219(18) 0.105(9) 0.073(6) -0.044(6) -0.020(8) 0.090(11) 
C17 0.192(18) 0.123(14) 0.178(16) -0.125(13) 0.096(13) -0.111(14) 
C18 0.069(8) 0.064(8) 0.063(5) -0.049(5) 0.010(5) -0.015(6) 
C19 0.094(7) 0.114(8) 0.100(9) -0.077(7) 0.045(6) -0.022(6) 
C20 0.195(15) 0.146(11) 0.082(7) -0.077(8) -0.062(9) 0.059(11) 
C21 0.077(4) 0.027(4) 0.071(3) -0.036(3) 0.022(3) -0.004(4) 
C22 0.140(8) 0.051(3) 0.095(6) -0.030(3) 0.055(5) -0.011(4) 
C23 0.091(5) 0.139(8) 0.161(8) -0.112(7) -0.031(5) 0.002(5) 
C24 0.098(10) 0.072(6) 0.083(8) -0.062(7) 0.057(7) -0.055(7) 
C25 0.063(4) 0.126(7) 0.256(14) -0.137(9) 0.029(5) -0.012(4) 
C26 0.275(17) 0.109(7) 0.075(5) -0.057(5) 0.090(8) -0.072(9) 
O1 0.0461(8) 0.0391(7) 0.0415(7) -0.0171(6) 0.0189(6) -0.0140(6) 
O2 0.062(6) 0.037(5) 0.066(4) -0.031(4) 0.025(4) -0.008(4) 
O3 0.060(7) 0.022(4) 0.048(3) -0.014(3) 0.026(4) 0.000(4) 
O4 0.094(6) 0.043(4) 0.046(2) -0.024(2) 0.029(3) -0.012(3) 
O5 0.083(8) 0.040(6) 0.082(10) -0.034(6) 0.055(8) -0.030(8) 
B1 0.0443(12) 0.0368(11) 0.0402(11) -0.0171(9) 0.0095(9) -0.0081(9) 
Si1 0.0409(3) 0.0425(3) 0.0394(3) -0.0121(2) 0.0123(2) -0.0113(2) 
 
_geom_special_details 
; 
 All esds (except the esd in the dihedral angle between two l.s. planes) 
 are estimated using the full covariance matrix.  The cell esds are taken 
 into account individually in the estimation of esds in distances, angles 
 and torsion angles; correlations between esds in cell parameters are only 
 used when they are defined by crystal symmetry.  An approximate (isotropic) 
 treatment of cell esds is used for estimating esds involving l.s. planes. 
; 
 
loop_ 
 _geom_bond_atom_site_label_1 
 _geom_bond_atom_site_label_2 
 _geom_bond_distance 
 _geom_bond_site_symmetry_2 
 _geom_bond_publ_flag 
C1 C2 1.383(3) . yes 
C1 C3 1.410(2) 2_665 yes 
C1 B1 1.557(3) . yes 
C2 O1 1.368(2) . yes 
C2 C3 1.411(3) . yes 
C3 C1 1.410(2) 2_665 yes 
C3 C4 1.439(3) . yes 
C4 C5 1.356(3) . yes 
C4 H1 0.9300 . no 
C5 O1 1.395(2) . yes 
C5 Si1 1.877(2) . yes 
C6 C7 1.504(4) . yes 
C6 C8 1.510(4) . yes 
C6 Si1 1.898(3) . yes 
C6 H2 0.9800 . no 
C7 H3 0.9600 . no 
C7 H4 0.9600 . no 
C7 H5 0.9600 . no 
C8 H6 0.9600 . no 
C8 H7 0.9600 . no 
C8 H8 0.9600 . no 
C9 C11 1.537(5) . yes 
C9 C10 1.540(5) . yes 
C9 Si1 1.882(3) . yes 
C9 H9 0.9800 . no 
C10 H10 0.9600 . no 
C10 H11 0.9600 . no 
C10 H12 0.9600 . no 
C11 H13 0.9600 . no 
C11 H14 0.9600 . no 
C11 H15 0.9600 . no 
C12 C13 1.519(4) . yes 
C12 C14 1.529(4) . yes 
C12 Si1 1.883(3) . yes 
C12 H16 0.9800 . no 
C13 H17 0.9600 . no 
C13 H18 0.9600 . no 
C13 H19 0.9600 . no 
C14 H20 0.9600 . no 
C14 H21 0.9600 . no 
C14 H22 0.9600 . no 
C15 C17 1.32(3) . yes 
C15 C18 1.49(4) . yes 
C15 O3 1.49(3) . yes 
C15 C16 1.62(3) . yes 
C16 H23 0.9600 . no 
C16 H24 0.9600 . no 
C16 H25 0.9600 . no 
C17 H26 0.9600 . no 
C17 H27 0.9600 . no 
C17 H28 0.9600 . no 
C18 C19 1.50(3) . yes 
C18 O4 1.57(3) . yes 
C18 C20 1.60(3) . yes 
C19 H29 0.9600 . no 
C19 H30 0.9600 . no 
C19 H31 0.9600 . no 
C20 H32 0.9600 . no 
C20 H33 0.9600 . no 
C20 H34 0.9600 . no 
C21 O2 1.428(18) . yes 
C21 C24 1.54(2) . yes 
C21 C22 1.554(12) . yes 
C21 C23 1.563(14) . yes 
C22 H35 0.9600 . no 
C22 H36 0.9600 . no 
C22 H37 0.9600 . no 
C23 H38 0.9600 . no 
C23 H39 0.9600 . no 
C23 H40 0.9600 . no 
C24 O5 1.32(3) . yes 
C24 C25 1.50(2) . yes 
C24 C26 1.518(17) . yes 
C25 H41 0.9600 . no 
C25 H42 0.9600 . no 
C25 H43 0.9600 . no 
C26 H44 0.9600 . no 
C26 H45 0.9600 . no 
C26 H46 0.9600 . no 
O2 B1 1.301(18) . yes 
O3 B1 1.42(2) . yes 
O4 B1 1.348(13) . yes 
O5 B1 1.37(2) . yes 
 
loop_ 
 _geom_angle_atom_site_label_1 
 _geom_angle_atom_site_label_2 
 _geom_angle_atom_site_label_3 
 _geom_angle 
 _geom_angle_site_symmetry_1 
 _geom_angle_site_symmetry_3 
 _geom_angle_publ_flag 
C2 C1 C3 112.75(16) . 2_665 yes 
C2 C1 B1 122.83(17) . . yes 
C3 C1 B1 124.41(18) 2_665 . yes 
O1 C2 C1 123.66(17) . . yes 
O1 C2 C3 109.45(17) . . yes 
C1 C2 C3 126.89(17) . . yes 
C1 C3 C2 120.36(18) 2_665 . yes 
C1 C3 C4 134.18(18) 2_665 . yes 
C2 C3 C4 105.44(16) . . yes 
C5 C4 C3 107.74(18) . . yes 
C5 C4 H1 126.1 . . no 
C3 C4 H1 126.1 . . no 
C4 C5 O1 109.84(17) . . yes 
C4 C5 Si1 136.27(17) . . yes 
O1 C5 Si1 113.89(13) . . yes 
C7 C6 C8 110.3(3) . . yes 
C7 C6 Si1 116.6(2) . . yes 
C8 C6 Si1 112.7(2) . . yes 
C7 C6 H2 105.4 . . no 
C8 C6 H2 105.4 . . no 
Si1 C6 H2 105.4 . . no 
C6 C7 H3 109.5 . . no 
C6 C7 H4 109.5 . . no 
H3 C7 H4 109.5 . . no 
C6 C7 H5 109.5 . . no 
H3 C7 H5 109.5 . . no 
H4 C7 H5 109.5 . . no 
C6 C8 H6 109.5 . . no 
C6 C8 H7 109.5 . . no 
H6 C8 H7 109.5 . . no 
C6 C8 H8 109.5 . . no 
H6 C8 H8 109.5 . . no 
H7 C8 H8 109.5 . . no 
C11 C9 C10 111.4(3) . . yes 
C11 C9 Si1 111.0(2) . . yes 
C10 C9 Si1 113.7(2) . . yes 
C11 C9 H9 106.8 . . no 
C10 C9 H9 106.8 . . no 
Si1 C9 H9 106.8 . . no 
C9 C10 H10 109.5 . . no 
C9 C10 H11 109.5 . . no 
H10 C10 H11 109.5 . . no 
C9 C10 H12 109.5 . . no 
H10 C10 H12 109.5 . . no 
H11 C10 H12 109.5 . . no 
C9 C11 H13 109.5 . . no 
C9 C11 H14 109.5 . . no 
H13 C11 H14 109.5 . . no 
C9 C11 H15 109.5 . . no 
H13 C11 H15 109.5 . . no 
H14 C11 H15 109.5 . . no 
C13 C12 C14 110.7(3) . . yes 
C13 C12 Si1 113.3(2) . . yes 
C14 C12 Si1 114.6(2) . . yes 
C13 C12 H16 105.8 . . no 
C14 C12 H16 105.8 . . no 
Si1 C12 H16 105.8 . . no 
C12 C13 H17 109.5 . . no 
C12 C13 H18 109.5 . . no 
H17 C13 H18 109.5 . . no 
C12 C13 H19 109.5 . . no 
H17 C13 H19 109.5 . . no 
H18 C13 H19 109.5 . . no 
C12 C14 H20 109.5 . . no 
C12 C14 H21 109.5 . . no 
H20 C14 H21 109.5 . . no 
C12 C14 H22 109.5 . . no 
H20 C14 H22 109.5 . . no 
H21 C14 H22 109.5 . . no 
C17 C15 C18 124(2) . . yes 
C17 C15 O3 115(2) . . yes 
C18 C15 O3 101.3(17) . . yes 
C17 C15 C16 114.7(16) . . yes 
C18 C15 C16 103.6(18) . . yes 
O3 C15 C16 93.1(16) . . yes 
C15 C18 C19 125(2) . . yes 
C15 C18 O4 109.2(17) . . yes 
C19 C18 O4 107.0(17) . . yes 
C15 C18 C20 109.0(19) . . yes 
C19 C18 C20 108.3(17) . . yes 
O4 C18 C20 94.0(17) . . yes 
O2 C21 C24 105.1(12) . . yes 
O2 C21 C22 115.0(11) . . yes 
C24 C21 C22 115.1(11) . . yes 
O2 C21 C23 101.6(11) . . yes 
C24 C21 C23 115.0(12) . . yes 
C22 C21 C23 104.5(8) . . yes 
C21 C22 H35 109.5 . . no 
C21 C22 H36 109.5 . . no 
H35 C22 H36 109.5 . . no 
C21 C22 H37 109.5 . . no 
H35 C22 H37 109.5 . . no 
H36 C22 H37 109.5 . . no 
C21 C23 H38 109.5 . . no 
C21 C23 H39 109.5 . . no 
H38 C23 H39 109.5 . . no 
C21 C23 H40 109.5 . . no 
H38 C23 H40 109.5 . . no 
H39 C23 H40 109.5 . . no 
O5 C24 C25 100.9(16) . . yes 
O5 C24 C26 117.3(18) . . yes 
C25 C24 C26 109.6(13) . . yes 
O5 C24 C21 102.9(13) . . yes 
C25 C24 C21 112.0(14) . . yes 
C26 C24 C21 113.3(12) . . yes 
C24 C25 H41 109.5 . . no 
C24 C25 H42 109.5 . . no 
H41 C25 H42 109.5 . . no 
C24 C25 H43 109.5 . . no 
H41 C25 H43 109.5 . . no 
H42 C25 H43 109.5 . . no 
C24 C26 H44 109.5 . . no 
C24 C26 H45 109.5 . . no 
H44 C26 H45 109.5 . . no 
C24 C26 H46 109.5 . . no 
H44 C26 H46 109.5 . . no 
H45 C26 H46 109.5 . . no 
C2 O1 C5 107.52(14) . . yes 
B1 O2 C21 106.1(12) . . yes 
B1 O3 C15 111.9(16) . . yes 
B1 O4 C18 105.0(14) . . yes 
C24 O5 B1 111.5(14) . . yes 
O2 B1 O4 115.7(10) . . yes 
O2 B1 O5 112.9(11) . . yes 
O4 B1 O5 14(2) . . yes 
O2 B1 O3 12.4(17) . . yes 
O4 B1 O3 112.3(11) . . yes 
O5 B1 O3 106.7(13) . . yes 
O2 B1 C1 122.7(7) . . yes 
O4 B1 C1 120.5(6) . . yes 
O5 B1 C1 124.3(9) . . yes 
O3 B1 C1 127.2(9) . . yes 
C5 Si1 C9 107.06(11) . . yes 
C5 Si1 C12 106.74(10) . . yes 
C9 Si1 C12 109.19(13) . . yes 
C5 Si1 C6 108.48(11) . . yes 
C9 Si1 C6 114.61(13) . . yes 
C12 Si1 C6 110.42(13) . . yes 
 
loop_ 
 _geom_torsion_atom_site_label_1 
 _geom_torsion_atom_site_label_2 
 _geom_torsion_atom_site_label_3 
 _geom_torsion_atom_site_label_4 
 _geom_torsion 
 _geom_torsion_site_symmetry_1 
 _geom_torsion_site_symmetry_2 
 _geom_torsion_site_symmetry_3 
 _geom_torsion_site_symmetry_4 
 _geom_torsion_publ_flag 
C3 C1 C2 O1 179.28(18) 2_665 . . . yes 
B1 C1 C2 O1 -1.1(3) . . . . yes 
C3 C1 C2 C3 0.3(3) 2_665 . . . yes 
B1 C1 C2 C3 179.9(2) . . . . yes 
O1 C2 C3 C1 -179.42(17) . . . 2_665 yes 
C1 C2 C3 C1 -0.3(4) . . . 2_665 yes 
O1 C2 C3 C4 -0.7(2) . . . . yes 
C1 C2 C3 C4 178.4(2) . . . . yes 
C1 C3 C4 C5 178.5(2) 2_665 . . . yes 
C2 C3 C4 C5 0.0(2) . . . . yes 
C3 C4 C5 O1 0.7(2) . . . . yes 
C3 C4 C5 Si1 -179.49(19) . . . . yes 
C17 C15 C18 C19 -96(3) . . . . yes 
O3 C15 C18 C19 133.6(19) . . . . yes 
C16 C15 C18 C19 38(2) . . . . yes 
C17 C15 C18 O4 135.8(18) . . . . yes 
O3 C15 C18 O4 5(2) . . . . yes 
C16 C15 C18 O4 -90.8(17) . . . . yes 
C17 C15 C18 C20 34(3) . . . . yes 
O3 C15 C18 C20 -96(2) . . . . yes 
C16 C15 C18 C20 167.8(14) . . . . yes 
O2 C21 C24 O5 -12(2) . . . . yes 
C22 C21 C24 O5 -139.2(17) . . . . yes 
C23 C21 C24 O5 99.2(17) . . . . yes 
O2 C21 C24 C25 95.9(13) . . . . yes 
C22 C21 C24 C25 -31.6(15) . . . . yes 
C23 C21 C24 C25 -153.2(8) . . . . yes 
O2 C21 C24 C26 -139.4(14) . . . . yes 
C22 C21 C24 C26 93.0(16) . . . . yes 
C23 C21 C24 C26 -28.5(18) . . . . yes 
C1 C2 O1 C5 -178.06(19) . . . . yes 
C3 C2 O1 C5 1.1(2) . . . . yes 
C4 C5 O1 C2 -1.1(2) . . . . yes 
Si1 C5 O1 C2 179.02(14) . . . . yes 
C24 C21 O2 B1 11.6(15) . . . . yes 
C22 C21 O2 B1 139.2(10) . . . . yes 
C23 C21 O2 B1 -108.6(12) . . . . yes 
C17 C15 O3 B1 -139(2) . . . . yes 
C18 C15 O3 B1 -3(3) . . . . yes 
C16 C15 O3 B1 101.5(19) . . . . yes 
C15 C18 O4 B1 -6(2) . . . . yes 
C19 C18 O4 B1 -143.6(16) . . . . yes 
C20 C18 O4 B1 105.9(16) . . . . yes 
C25 C24 O5 B1 -108(2) . . . . yes 
C26 C24 O5 B1 132.7(17) . . . . yes 
C21 C24 O5 B1 8(3) . . . . yes 
C21 O2 B1 O4 7.1(17) . . . . yes 
C21 O2 B1 O5 -7.7(19) . . . . yes 
C21 O2 B1 O3 -70(8) . . . . yes 
C21 O2 B1 C1 175.0(7) . . . . yes 
C18 O4 B1 O2 -9.3(19) . . . . yes 
C18 O4 B1 O5 72(6) . . . . yes 
C18 O4 B1 O3 4(2) . . . . yes 
C18 O4 B1 C1 -177.5(10) . . . . yes 
C24 O5 B1 O2 0(3) . . . . yes 
C24 O5 B1 O4 -105(7) . . . . yes 
C24 O5 B1 O3 11(3) . . . . yes 
C24 O5 B1 C1 176.9(14) . . . . yes 
C15 O3 B1 O2 108(9) . . . . yes 
C15 O3 B1 O4 -1(2) . . . . yes 
C15 O3 B1 O5 -14(3) . . . . yes 
C15 O3 B1 C1 -179.1(13) . . . . yes 
C2 C1 B1 O2 178.0(9) . . . . yes 
C3 C1 B1 O2 -2.4(10) 2_665 . . . yes 
C2 C1 B1 O4 -14.6(10) . . . . yes 
C3 C1 B1 O4 165.0(10) 2_665 . . . yes 
C2 C1 B1 O5 1.1(15) . . . . yes 
C3 C1 B1 O5 -179.3(15) 2_665 . . . yes 
C2 C1 B1 O3 163.9(14) . . . . yes 
C3 C1 B1 O3 -16.5(14) 2_665 . . . yes 
C4 C5 Si1 C9 -112.3(3) . . . . yes 
O1 C5 Si1 C9 67.54(18) . . . . yes 
C4 C5 Si1 C12 4.6(3) . . . . yes 
O1 C5 Si1 C12 -175.63(15) . . . . yes 
C4 C5 Si1 C6 123.5(3) . . . . yes 
O1 C5 Si1 C6 -56.65(19) . . . . yes 
C11 C9 Si1 C5 58.1(2) . . . . yes 
C10 C9 Si1 C5 -68.4(2) . . . . yes 
C11 C9 Si1 C12 -57.1(3) . . . . yes 
C10 C9 Si1 C12 176.4(2) . . . . yes 
C11 C9 Si1 C6 178.4(2) . . . . yes 
C10 C9 Si1 C6 51.9(3) . . . . yes 
C13 C12 Si1 C5 69.7(2) . . . . yes 
C14 C12 Si1 C5 -161.9(2) . . . . yes 
C13 C12 Si1 C9 -174.9(2) . . . . yes 
C14 C12 Si1 C9 -46.5(3) . . . . yes 
C13 C12 Si1 C6 -48.0(3) . . . . yes 
C14 C12 Si1 C6 80.4(2) . . . . yes 
C7 C6 Si1 C5 41.9(3) . . . . yes 
C8 C6 Si1 C5 170.9(3) . . . . yes 
C7 C6 Si1 C9 -77.7(3) . . . . yes 
C8 C6 Si1 C9 51.3(3) . . . . yes 
C7 C6 Si1 C12 158.5(3) . . . . yes 
C8 C6 Si1 C12 -72.5(3) . . . . yes 
 
_diffrn_measured_fraction_theta_max    0.958 
_diffrn_reflns_theta_full              27.48 
_diffrn_measured_fraction_theta_full   0.958 
_refine_diff_density_max    0.366 
_refine_diff_density_min   -0.279 
_refine_diff_density_rms    0.054 

#--END


data_TIPS-Bpin-BDT 
 
_audit_creation_method            SHELXL-97 
_chemical_name_systematic 
; 
TIPS-Bpin-BDT 
; 
_chemical_name_common             TIPS-Bpin-BDT 
_chemical_melting_point           ? 
_chemical_formula_moiety          'C40 H68 B2 O4 S2 Si2'  
_chemical_formula_sum 
 'C40 H68 B2 O4 S2 Si2' 
_chemical_formula_weight          754.86 
 
loop_ 
 _atom_type_symbol 
 _atom_type_description 
 _atom_type_scat_dispersion_real 
 _atom_type_scat_dispersion_imag 
 _atom_type_scat_source 
 'C'  'C'   0.0033   0.0016 
 'International Tables Vol C Tables 4.2.6.8 and 6.1.1.4' 
 'H'  'H'   0.0000   0.0000 
 'International Tables Vol C Tables 4.2.6.8 and 6.1.1.4' 
 'B'  'B'   0.0013   0.0007 
 'International Tables Vol C Tables 4.2.6.8 and 6.1.1.4' 
 'O'  'O'   0.0106   0.0060 
 'International Tables Vol C Tables 4.2.6.8 and 6.1.1.4' 
 'Si'  'Si'   0.0817   0.0704 
 'International Tables Vol C Tables 4.2.6.8 and 6.1.1.4' 
 'S'  'S'   0.1246   0.1234 
 'International Tables Vol C Tables 4.2.6.8 and 6.1.1.4' 
 
_symmetry_cell_setting            monoclinic  
_symmetry_space_group_name_H-M    'P 1 21 1'  
 
loop_ 
 _symmetry_equiv_pos_as_xyz 
 'x, y, z' 
 '-x, y+1/2, -z' 
 
_cell_length_a                    12.3238(9) 
_cell_length_b                    13.3375(7) 
_cell_length_c                    14.9419(11) 
_cell_angle_alpha                 90.00 
_cell_angle_beta                  113.6966(10) 
_cell_angle_gamma                 90.00 
_cell_volume                      2248.9(3) 
_cell_formula_units_Z             2 
_cell_measurement_temperature     293(2) 
_cell_measurement_reflns_used     5888 
_cell_measurement_theta_min       3.1 
_cell_measurement_theta_max       27.5
 
_exptl_crystal_description        'Block' 
_exptl_crystal_colour             'Colorless' 
_exptl_crystal_size_max           0.80 
_exptl_crystal_size_mid           0.50 
_exptl_crystal_size_min           0.20 
_exptl_crystal_density_meas       ? 
_exptl_crystal_density_diffrn     1.115 
_exptl_crystal_density_method     'not measured' 
_exptl_crystal_F_000              820 
_exptl_absorpt_coefficient_mu     0.207 
_exptl_absorpt_correction_type    none  
_exptl_absorpt_correction_T_min   ? 
_exptl_absorpt_correction_T_max   ? 
_exptl_absorpt_process_details    ? 
 
_exptl_special_details 
; 
 ? 
; 
 
_diffrn_ambient_temperature       293(2) 
_diffrn_radiation_wavelength      0.71070 
_diffrn_radiation_type            MoK\a 
_diffrn_radiation_source          'fine-focus sealed tube' 
_diffrn_radiation_monochromator   graphite 
_diffrn_measurement_device_type   'Rigaku/MSC Mercury CCD'  
_diffrn_measurement_method        \w 
_diffrn_detector_area_resol_mean  14.71 
_diffrn_standards_number          17150 
_diffrn_standards_interval_count  ? 
_diffrn_standards_interval_time   ? 
_diffrn_standards_decay_%         ? 
_diffrn_reflns_number             17021 
_diffrn_reflns_av_R_equivalents   0.0299 
_diffrn_reflns_av_sigmaI/netI     0.0419 
_diffrn_reflns_limit_h_min        -15 
_diffrn_reflns_limit_h_max        15 
_diffrn_reflns_limit_k_min        -17 
_diffrn_reflns_limit_k_max        12 
_diffrn_reflns_limit_l_min        -19 
_diffrn_reflns_limit_l_max        12 
_diffrn_reflns_theta_min          3.05 
_diffrn_reflns_theta_max          27.48 
_reflns_number_total              7605 
_reflns_number_gt                 6307 
_reflns_threshold_expression      >2sigma(I) 
 
_computing_data_collection        'CrystalClear 1.3.5'
_computing_cell_refinement        'CrystalClear 1.3.5' 
_computing_data_reduction         'CrystalClear 1.3.5'
_computing_structure_solution     'SHELXS-97 (Sheldrick, 1990)' 
_computing_structure_refinement   'SHELXL-97 (Sheldrick, 1997)' 
_computing_molecular_graphics     ? 
_computing_publication_material   ? 
 
_refine_special_details 
; 
 Refinement of F^2^ against ALL reflections.  The weighted R-factor wR and 
 goodness of fit S are based on F^2^, conventional R-factors R are based 
 on F, with F set to zero for negative F^2^. The threshold expression of 
 F^2^ > 2sigma(F^2^) is used only for calculating R-factors(gt) etc. and is 
 not relevant to the choice of reflections for refinement.  R-factors based 
 on F^2^ are statistically about twice as large as those based on F, and R- 
 factors based on ALL data will be even larger. 
; 
 
_refine_ls_structure_factor_coef  Fsqd  
_refine_ls_matrix_type            full 
_refine_ls_weighting_scheme       calc  
_refine_ls_weighting_details 
 'calc w=1/[\s^2^(Fo^2^)+(0.1197P)^2^+0.0000P] where P=(Fo^2^+2Fc^2^)/3' 
_atom_sites_solution_primary      direct 
_atom_sites_solution_secondary    difmap 
_atom_sites_solution_hydrogens    geom 
_refine_ls_hydrogen_treatment     noref 
_refine_ls_extinction_method      none 
_refine_ls_extinction_coef        ? 
_refine_ls_abs_structure_details 
 'Flack H D (1983), Acta Cryst. A39, 876-881' 
_refine_ls_abs_structure_Flack    0.58(9) 
_refine_ls_number_reflns          7605 
_refine_ls_number_parameters      471 
_refine_ls_number_restraints      1 
_refine_ls_R_factor_all           0.0679 
_refine_ls_R_factor_gt            0.0617 
_refine_ls_wR_factor_ref          0.1703 
_refine_ls_wR_factor_gt           0.1633 
_refine_ls_goodness_of_fit_ref    1.014 
_refine_ls_restrained_S_all       1.014 
_refine_ls_shift/su_max           0.074 
_refine_ls_shift/su_mean          0.003 
 
loop_ 
 _atom_site_label 
 _atom_site_type_symbol 
 _atom_site_fract_x 
 _atom_site_fract_y 
 _atom_site_fract_z 
 _atom_site_U_iso_or_equiv 
 _atom_site_adp_type 
 _atom_site_occupancy 
 _atom_site_symmetry_multiplicity 
 _atom_site_calc_flag 
 _atom_site_refinement_flags 
 _atom_site_disorder_assembly 
 _atom_site_disorder_group 
S1 S -0.17658(4) 0.34993(4) 0.80902(3) 0.04530(13) Uani 1 1 d . . . 
C1 C -0.06550(17) 0.26179(19) 0.86818(13) 0.0457(6) Uani 1 1 d . . . 
C2 C 0.03870(17) 0.29090(18) 0.86431(13) 0.0436(5) Uani 1 1 d . . . 
H1 H 0.1081 0.2539 0.8933 0.052 Uiso 1 1 calc R . . 
C3 C 0.03384(15) 0.38224(16) 0.81257(12) 0.0376(5) Uani 1 1 d . . . 
C4 C 0.12550(15) 0.42763(16) 0.79267(12) 0.0372(5) Uani 1 1 d . . . 
C5 C 0.09505(15) 0.51541(16) 0.73691(11) 0.0347(4) Uani 1 1 d . . . 
S2 S 0.18804(4) 0.58964(4) 0.70165(4) 0.04614(13) Uani 1 1 d . . . 
C6 C 0.07576(17) 0.67517(18) 0.63982(13) 0.0417(5) Uani 1 1 d . . . 
C7 C -0.02800(18) 0.64812(18) 0.64669(12) 0.0421(5) Uani 1 1 d . . . 
H2 H -0.0975 0.6852 0.6186 0.050 Uiso 1 1 calc R . . 
C8 C -0.02007(16) 0.55719(16) 0.70124(12) 0.0356(5) Uani 1 1 d . . . 
C9 C -0.11292(16) 0.51231(18) 0.71961(12) 0.0396(5) Uani 1 1 d . . . 
C10 C -0.08195(16) 0.42438(18) 0.77623(12) 0.0376(5) Uani 1 1 d . . . 
Si1 Si -0.08423(5) 0.14680(5) 0.93305(4) 0.04451(15) Uani 1 1 d . . . 
C11 C -0.2390(2) 0.0977(3) 0.86905(17) 0.0696(8) Uani 1 1 d . . . 
H3 H -0.2910 0.1495 0.8768 0.084 Uiso 1 1 calc R . . 
C12 C -0.2600(3) 0.0024(3) 0.9200(2) 0.1068(12) Uani 1 1 d . . . 
H4 H -0.3410 -0.0187 0.8873 0.160 Uiso 1 1 calc R . . 
H5 H -0.2435 0.0173 0.9871 0.160 Uiso 1 1 calc R . . 
H6 H -0.2085 -0.0504 0.9170 0.160 Uiso 1 1 calc R . . 
C13 C -0.2814(4) 0.0805(4) 0.7614(2) 0.1222(16) Uani 1 1 d . . . 
H7 H -0.2467 0.0200 0.7499 0.183 Uiso 1 1 calc R . . 
H8 H -0.2586 0.1361 0.7320 0.183 Uiso 1 1 calc R . . 
H9 H -0.3662 0.0743 0.7332 0.183 Uiso 1 1 calc R . . 
C14 C -0.0624(2) 0.1835(2) 1.06233(15) 0.0627(7) Uani 1 1 d . . . 
H10 H -0.0488 0.1215 1.1005 0.075 Uiso 1 1 calc R . . 
C15 C 0.0445(3) 0.2506(3) 1.1132(2) 0.0933(12) Uani 1 1 d . . . 
H11 H 0.0415 0.3066 1.0719 0.140 Uiso 1 1 calc R . . 
H12 H 0.1158 0.2131 1.1264 0.140 Uiso 1 1 calc R . . 
H13 H 0.0440 0.2746 1.1736 0.140 Uiso 1 1 calc R . . 
C16 C -0.1726(3) 0.2337(4) 1.0660(2) 0.1111(13) Uani 1 1 d . . . 
H14 H -0.1544 0.2583 1.1308 0.167 Uiso 1 1 calc R . . 
H15 H -0.2358 0.1857 1.0488 0.167 Uiso 1 1 calc R . . 
H16 H -0.1966 0.2886 1.0206 0.167 Uiso 1 1 calc R . . 
C17 C 0.0298(2) 0.0511(2) 0.9387(2) 0.0752(7) Uani 1 1 d . . . 
H17 H 0.0028 -0.0117 0.9570 0.090 Uiso 1 1 calc R . . 
C18 C 0.1564(3) 0.0664(3) 1.0155(3) 0.1047(11) Uani 1 1 d . . . 
H18 H 0.2000 0.0049 1.0241 0.157 Uiso 1 1 calc R . . 
H19 H 0.1538 0.0858 1.0765 0.157 Uiso 1 1 calc R . . 
H20 H 0.1947 0.1180 0.9940 0.157 Uiso 1 1 calc R . . 
C19 C 0.0369(3) 0.0295(4) 0.8412(2) 0.1253(12) Uani 1 1 d . . . 
H21 H 0.0692 0.0868 0.8216 0.188 Uiso 1 1 calc R . . 
H22 H -0.0410 0.0158 0.7928 0.188 Uiso 1 1 calc R . . 
H23 H 0.0870 -0.0275 0.8479 0.188 Uiso 1 1 calc R . . 
Si2 Si 0.09819(5) 0.79174(5) 0.57878(4) 0.04630(16) Uani 1 1 d . . . 
C20 C 0.1973(3) 0.7546(3) 0.51548(17) 0.0778(9) Uani 1 1 d . . . 
H24 H 0.2690 0.7264 0.5663 0.093 Uiso 1 1 calc R . . 
C21 C 0.1460(4) 0.6733(4) 0.4408(3) 0.1315(16) Uani 1 1 d . . . 
H25 H 0.0642 0.6876 0.4017 0.197 Uiso 1 1 calc R . . 
H26 H 0.1522 0.6101 0.4733 0.197 Uiso 1 1 calc R . . 
H27 H 0.1889 0.6701 0.3995 0.197 Uiso 1 1 calc R . . 
C22 C 0.2375(3) 0.8434(4) 0.4738(2) 0.1373(14) Uani 1 1 d . . . 
H28 H 0.2650 0.8205 0.4256 0.206 Uiso 1 1 calc R . . 
H29 H 0.3007 0.8772 0.5253 0.206 Uiso 1 1 calc R . . 
H30 H 0.1723 0.8887 0.4440 0.206 Uiso 1 1 calc R . . 
C23 C 0.1795(3) 0.8860(3) 0.6774(2) 0.0778(9) Uani 1 1 d . . . 
H31 H 0.1343 0.8886 0.7183 0.093 Uiso 1 1 calc R . . 
C24 C 0.3017(4) 0.8567(4) 0.7457(2) 0.1069(14) Uani 1 1 d . . . 
H32 H 0.3542 0.8620 0.7128 0.160 Uiso 1 1 calc R . . 
H33 H 0.3012 0.7888 0.7668 0.160 Uiso 1 1 calc R . . 
H34 H 0.3284 0.9004 0.8014 0.160 Uiso 1 1 calc R . . 
C25 C 0.1764(4) 0.9939(3) 0.6404(3) 0.1127(15) Uani 1 1 d . . . 
H35 H 0.2101 1.0384 0.6951 0.169 Uiso 1 1 calc R . . 
H36 H 0.0959 1.0130 0.6021 0.169 Uiso 1 1 calc R . . 
H37 H 0.2214 0.9976 0.6009 0.169 Uiso 1 1 calc R . . 
C26 C -0.0466(3) 0.8466(3) 0.4989(2) 0.0887(10) Uani 1 1 d . . . 
H38 H -0.0275 0.9030 0.4657 0.106 Uiso 1 1 calc R . . 
C27 C -0.1272(4) 0.7769(4) 0.4161(2) 0.1372(18) Uani 1 1 d . . . 
H39 H -0.1144 0.7086 0.4380 0.206 Uiso 1 1 calc R . . 
H40 H -0.1086 0.7845 0.3600 0.206 Uiso 1 1 calc R . . 
H41 H -0.2086 0.7945 0.3990 0.206 Uiso 1 1 calc R . . 
C28 C -0.1148(3) 0.8936(3) 0.5562(4) 0.1408(18) Uani 1 1 d . . . 
H42 H -0.1759 0.9370 0.5137 0.211 Uiso 1 1 calc R . . 
H43 H -0.0609 0.9315 0.6105 0.211 Uiso 1 1 calc R . . 
H44 H -0.1498 0.8412 0.5799 0.211 Uiso 1 1 calc R . . 
B1 B 0.2529(2) 0.3826(2) 0.83370(15) 0.0433(6) Uani 1 1 d . . . 
O1 O 0.28648(14) 0.30550(15) 0.89939(12) 0.0688(5) Uani 1 1 d . . . 
C29 C 0.40501(19) 0.2719(2) 0.91265(16) 0.0566(7) Uani 1 1 d . . . 
C30 C 0.45031(19) 0.3625(2) 0.87172(18) 0.0595(7) Uani 1 1 d . . . 
O2 O 0.34155(13) 0.41441(15) 0.80973(11) 0.0596(5) Uani 1 1 d . . . 
C31 C 0.3873(4) 0.1785(3) 0.8509(3) 0.1126(14) Uani 1 1 d . . . 
H45 H 0.3315 0.1350 0.8616 0.169 Uiso 1 1 calc R . . 
H46 H 0.4616 0.1443 0.8689 0.169 Uiso 1 1 calc R . . 
H47 H 0.3575 0.1968 0.7831 0.169 Uiso 1 1 calc R . . 
C32 C 0.4721(3) 0.2472(3) 1.0184(2) 0.0974(12) Uani 1 1 d . . . 
H48 H 0.4817 0.3068 1.0569 0.146 Uiso 1 1 calc R . . 
H49 H 0.5486 0.2209 1.0282 0.146 Uiso 1 1 calc R . . 
H50 H 0.4290 0.1980 1.0379 0.146 Uiso 1 1 calc R . . 
C33 C 0.5226(2) 0.3375(4) 0.8179(2) 0.1226(11) Uani 1 1 d . . . 
H51 H 0.4788 0.2938 0.7644 0.184 Uiso 1 1 calc R . . 
H52 H 0.5937 0.3045 0.8607 0.184 Uiso 1 1 calc R . . 
H53 H 0.5428 0.3978 0.7930 0.184 Uiso 1 1 calc R . . 
C34 C 0.5167(3) 0.4377(4) 0.9537(3) 0.1078(15) Uani 1 1 d . . . 
H54 H 0.5234 0.5009 0.9254 0.162 Uiso 1 1 calc R . . 
H55 H 0.5945 0.4124 0.9924 0.162 Uiso 1 1 calc R . . 
H56 H 0.4738 0.4469 0.9943 0.162 Uiso 1 1 calc R . . 
B2 B -0.2412(2) 0.5585(2) 0.67805(16) 0.0434(6) Uani 1 1 d . . . 
O3 O -0.27213(16) 0.63883(18) 0.61984(16) 0.0930(7) Uani 1 1 d . . . 
C35 C -0.3942(2) 0.6614(3) 0.5949(2) 0.0875(10) Uani 1 1 d . . . 
C36 C -0.4350(2) 0.5819(3) 0.6449(2) 0.0771(9) Uani 1 1 d . . . 
O4 O -0.33062(14) 0.52343(17) 0.69857(13) 0.0704(5) Uani 1 1 d . . . 
C37 C -0.3959(5) 0.7626(6) 0.6282(7) 0.300(4) Uani 1 1 d . . . 
H57 H -0.3336 0.8006 0.6213 0.450 Uiso 1 1 calc R . . 
H58 H -0.3844 0.7616 0.6957 0.450 Uiso 1 1 calc R . . 
H59 H -0.4710 0.7929 0.5899 0.450 Uiso 1 1 calc R . . 
C38 C -0.4542(5) 0.6608(10) 0.4841(3) 0.295(6) Uani 1 1 d . . . 
H60 H -0.5301 0.6929 0.4634 0.442 Uiso 1 1 calc R . . 
H61 H -0.4646 0.5928 0.4610 0.442 Uiso 1 1 calc R . . 
H62 H -0.4058 0.6962 0.4578 0.442 Uiso 1 1 calc R . . 
C39 C -0.4750(5) 0.6239(6) 0.7197(4) 0.253(3) Uani 1 1 d . . . 
H63 H -0.4942 0.5699 0.7532 0.380 Uiso 1 1 calc R . . 
H64 H -0.5439 0.6650 0.6878 0.380 Uiso 1 1 calc R . . 
H65 H -0.4127 0.6637 0.7658 0.380 Uiso 1 1 calc R . . 
C40 C -0.5277(5) 0.5128(6) 0.5832(6) 0.295(4) Uani 1 1 d . . . 
H66 H -0.5052 0.4848 0.5340 0.443 Uiso 1 1 calc R . . 
H67 H -0.6010 0.5485 0.5525 0.443 Uiso 1 1 calc R . . 
H68 H -0.5374 0.4598 0.6229 0.443 Uiso 1 1 calc R . . 
 
loop_ 
 _atom_site_aniso_label 
 _atom_site_aniso_U_11 
 _atom_site_aniso_U_22 
 _atom_site_aniso_U_33 
 _atom_site_aniso_U_23 
 _atom_site_aniso_U_13 
 _atom_site_aniso_U_12 
S1 0.0368(2) 0.0463(3) 0.0562(2) 0.0153(2) 0.02229(17) 0.0065(2) 
C1 0.0406(9) 0.0486(13) 0.0473(8) 0.0130(9) 0.0172(7) 0.0046(10) 
C2 0.0393(8) 0.0413(12) 0.0526(8) 0.0154(8) 0.0208(7) 0.0107(9) 
C3 0.0325(8) 0.0364(11) 0.0426(7) 0.0090(8) 0.0139(6) 0.0050(8) 
C4 0.0345(8) 0.0341(11) 0.0458(7) 0.0096(7) 0.0190(6) 0.0046(8) 
C5 0.0336(8) 0.0319(10) 0.0397(6) 0.0050(7) 0.0158(6) 0.0066(8) 
S2 0.0411(2) 0.0398(3) 0.0628(2) 0.0152(2) 0.02642(18) 0.0050(2) 
C6 0.0464(9) 0.0322(11) 0.0504(8) 0.0091(8) 0.0235(7) 0.0046(9) 
C7 0.0433(9) 0.0365(11) 0.0447(7) 0.0083(8) 0.0160(7) 0.0027(9) 
C8 0.0347(8) 0.0343(11) 0.0371(6) 0.0037(7) 0.0136(6) 0.0046(8) 
C9 0.0313(8) 0.0418(12) 0.0439(7) 0.0045(8) 0.0133(7) 0.0083(9) 
C10 0.0305(8) 0.0397(12) 0.0424(7) 0.0076(8) 0.0145(6) 0.0047(8) 
Si1 0.0466(3) 0.0395(3) 0.0535(2) 0.0147(2) 0.02640(19) 0.0054(3) 
C11 0.0596(13) 0.0724(19) 0.0680(12) 0.0188(13) 0.0164(11) -0.0121(14) 
C12 0.0851(19) 0.102(3) 0.122(2) 0.035(2) 0.0292(17) -0.039(2) 
C13 0.141(3) 0.129(4) 0.0818(17) -0.001(2) 0.0297(19) -0.059(3) 
C14 0.0810(14) 0.0562(15) 0.0532(9) 0.0185(10) 0.0292(9) 0.0163(13) 
C15 0.112(2) 0.086(3) 0.0724(14) -0.0074(17) 0.0271(15) -0.015(2) 
C16 0.1276(17) 0.143(4) 0.0895(13) 0.0014(18) 0.0719(12) 0.047(2) 
C17 0.0883(14) 0.0434(15) 0.1159(15) 0.0213(12) 0.0640(12) 0.0175(13) 
C18 0.0687(15) 0.093(2) 0.164(2) 0.064(2) 0.0580(15) 0.0371(16) 
C19 0.193(2) 0.085(3) 0.1486(18) -0.006(2) 0.1219(17) 0.024(2) 
Si2 0.0571(3) 0.0352(3) 0.0505(2) 0.0092(2) 0.0257(2) 0.0026(3) 
C20 0.1014(18) 0.069(2) 0.0676(11) 0.0143(13) 0.0390(12) 0.0096(17) 
C21 0.177(3) 0.124(4) 0.1131(19) -0.048(2) 0.078(2) -0.001(3) 
C22 0.174(2) 0.143(4) 0.1551(17) 0.049(2) 0.1287(15) 0.010(3) 
C23 0.0874(18) 0.0609(19) 0.0831(14) -0.0007(14) 0.0323(13) -0.0064(16) 
C24 0.106(3) 0.091(3) 0.0779(17) -0.002(2) -0.0113(18) -0.021(3) 
C25 0.135(3) 0.051(2) 0.127(2) -0.006(2) 0.026(2) -0.017(2) 
C26 0.0660(17) 0.0664(19) 0.1084(18) 0.0424(16) 0.0084(15) -0.0022(17) 
C27 0.111(3) 0.145(4) 0.090(2) 0.055(2) -0.028(2) -0.040(3) 
C28 0.090(2) 0.063(2) 0.273(5) 0.042(3) 0.076(3) 0.029(2) 
B1 0.0364(10) 0.0422(14) 0.0493(9) 0.0086(10) 0.0152(8) 0.0051(10) 
O1 0.0387(7) 0.0729(12) 0.0929(9) 0.0480(9) 0.0246(7) 0.0200(8) 
C29 0.0360(10) 0.0567(16) 0.0720(11) 0.0171(11) 0.0165(9) 0.0132(11) 
C30 0.0313(9) 0.0567(16) 0.0873(12) 0.0215(12) 0.0207(9) 0.0093(11) 
O2 0.0388(7) 0.0615(11) 0.0833(8) 0.0302(8) 0.0295(6) 0.0137(8) 
C31 0.119(3) 0.064(2) 0.159(3) -0.017(2) 0.060(2) -0.009(2) 
C32 0.0639(18) 0.109(3) 0.1034(19) 0.0543(19) 0.0168(15) 0.016(2) 
C33 0.1048(15) 0.124(3) 0.188(2) 0.082(2) 0.1100(14) 0.0615(19) 
C34 0.076(2) 0.087(3) 0.134(3) 0.001(2) 0.014(2) -0.029(2) 
B2 0.0337(10) 0.0421(14) 0.0500(10) 0.0101(10) 0.0123(8) 0.0101(10) 
O3 0.0443(8) 0.0979(15) 0.1389(13) 0.0752(12) 0.0390(8) 0.0297(10) 
C35 0.0460(13) 0.090(2) 0.1209(18) 0.0576(18) 0.0271(13) 0.0345(15) 
C36 0.0353(11) 0.078(2) 0.1122(18) 0.0361(17) 0.0233(12) 0.0204(13) 
O4 0.0410(7) 0.0713(13) 0.1026(9) 0.0438(10) 0.0328(7) 0.0228(8) 
C37 0.245(4) 0.089(5) 0.698(11) 0.061(6) 0.326(5) 0.051(4) 
C38 0.079(3) 0.661(19) 0.103(3) 0.128(6) -0.005(2) -0.003(6) 
C39 0.314(3) 0.317(7) 0.230(3) 0.151(4) 0.216(3) 0.234(4) 
C40 0.131(4) 0.177(6) 0.356(8) 0.134(6) -0.133(4) -0.077(4) 
 
_geom_special_details 
; 
 All esds (except the esd in the dihedral angle between two l.s. planes) 
 are estimated using the full covariance matrix.  The cell esds are taken 
 into account individually in the estimation of esds in distances, angles 
 and torsion angles; correlations between esds in cell parameters are only 
 used when they are defined by crystal symmetry.  An approximate (isotropic) 
 treatment of cell esds is used for estimating esds involving l.s. planes. 
; 
 
loop_ 
 _geom_bond_atom_site_label_1 
 _geom_bond_atom_site_label_2 
 _geom_bond_distance 
 _geom_bond_site_symmetry_2 
 _geom_bond_publ_flag 
S1 C10 1.745(2) . yes 
S1 C1 1.751(2) . yes 
C1 C2 1.365(3) . yes 
C1 Si1 1.877(2) . yes 
C2 C3 1.431(3) . yes 
C2 H1 0.9300 . no 
C3 C4 1.414(3) . yes 
C3 C10 1.423(3) . yes 
C4 C5 1.398(3) . yes 
C4 B1 1.558(3) . yes 
C5 C8 1.414(2) . yes 
C5 S2 1.748(2) . yes 
S2 C6 1.744(2) . yes 
C6 C7 1.372(3) . yes 
C6 Si2 1.878(2) . yes 
C7 C8 1.442(3) . yes 
C7 H2 0.9300 . no 
C8 C9 1.413(3) . yes 
C9 C10 1.406(3) . yes 
C9 B2 1.574(3) . yes 
Si1 C17 1.874(3) . yes 
Si1 C11 1.875(3) . yes 
Si1 C14 1.904(2) . yes 
C11 C13 1.496(4) . yes 
C11 C12 1.556(5) . yes 
C11 H3 0.9800 . no 
C12 H4 0.9600 . no 
C12 H5 0.9600 . no 
C12 H6 0.9600 . no 
C13 H7 0.9600 . no 
C13 H8 0.9600 . no 
C13 H9 0.9600 . no 
C14 C15 1.520(5) . yes 
C14 C16 1.534(4) . yes 
C14 H10 0.9800 . no 
C15 H11 0.9600 . no 
C15 H12 0.9600 . no 
C15 H13 0.9600 . no 
C16 H14 0.9600 . no 
C16 H15 0.9600 . no 
C16 H16 0.9600 . no 
C17 C19 1.522(4) . yes 
C17 C18 1.535(4) . yes 
C17 H17 0.9800 . no 
C18 H18 0.9600 . no 
C18 H19 0.9600 . no 
C18 H20 0.9600 . no 
C19 H21 0.9600 . no 
C19 H22 0.9600 . no 
C19 H23 0.9600 . no 
Si2 C26 1.853(3) . yes 
Si2 C20 1.887(3) . yes 
Si2 C23 1.889(3) . yes 
C20 C21 1.502(5) . yes 
C20 C22 1.510(6) . yes 
C20 H24 0.9800 . no 
C21 H25 0.9600 . no 
C21 H26 0.9600 . no 
C21 H27 0.9600 . no 
C22 H28 0.9600 . no 
C22 H29 0.9600 . no 
C22 H30 0.9600 . no 
C23 C24 1.492(5) . yes 
C23 C25 1.536(5) . yes 
C23 H31 0.9800 . no 
C24 H32 0.9600 . no 
C24 H33 0.9600 . no 
C24 H34 0.9600 . no 
C25 H35 0.9600 . no 
C25 H36 0.9600 . no 
C25 H37 0.9600 . no 
C26 C27 1.547(5) . yes 
C26 C28 1.553(6) . yes 
C26 H38 0.9800 . no 
C27 H39 0.9600 . no 
C27 H40 0.9600 . no 
C27 H41 0.9600 . no 
C28 H42 0.9600 . no 
C28 H43 0.9600 . no 
C28 H44 0.9600 . no 
B1 O2 1.347(3) . yes 
B1 O1 1.366(3) . yes 
O1 C29 1.463(3) . yes 
C29 C32 1.496(3) . yes 
C29 C31 1.513(5) . yes 
C29 C30 1.556(4) . yes 
C30 C33 1.459(4) . yes 
C30 O2 1.461(3) . yes 
C30 C34 1.540(5) . yes 
C31 H45 0.9600 . no 
C31 H46 0.9600 . no 
C31 H47 0.9600 . no 
C32 H48 0.9600 . no 
C32 H49 0.9600 . no 
C32 H50 0.9600 . no 
C33 H51 0.9600 . no 
C33 H52 0.9600 . no 
C33 H53 0.9600 . no 
C34 H54 0.9600 . no 
C34 H55 0.9600 . no 
C34 H56 0.9600 . no 
B2 O3 1.335(3) . yes 
B2 O4 1.341(3) . yes 
O3 C35 1.429(3) . yes 
C35 C37 1.440(8) . yes 
C35 C36 1.496(5) . yes 
C35 C38 1.518(5) . yes 
C36 O4 1.441(3) . yes 
C36 C40 1.470(7) . yes 
C36 C39 1.499(6) . yes 
C37 H57 0.9600 . no 
C37 H58 0.9600 . no 
C37 H59 0.9600 . no 
C38 H60 0.9600 . no 
C38 H61 0.9600 . no 
C38 H62 0.9600 . no 
C39 H63 0.9600 . no 
C39 H64 0.9600 . no 
C39 H65 0.9600 . no 
C40 H66 0.9600 . no 
C40 H67 0.9600 . no 
C40 H68 0.9600 . no 
 
loop_ 
 _geom_angle_atom_site_label_1 
 _geom_angle_atom_site_label_2 
 _geom_angle_atom_site_label_3 
 _geom_angle 
 _geom_angle_site_symmetry_1 
 _geom_angle_site_symmetry_3 
 _geom_angle_publ_flag 
C10 S1 C1 92.79(10) . . yes 
C2 C1 S1 110.22(17) . . yes 
C2 C1 Si1 124.56(16) . . yes 
S1 C1 Si1 125.16(12) . . yes 
C1 C2 C3 115.42(18) . . yes 
C1 C2 H1 122.3 . . no 
C3 C2 H1 122.3 . . no 
C4 C3 C10 120.92(18) . . yes 
C4 C3 C2 127.90(17) . . yes 
C10 C3 C2 111.11(18) . . yes 
C5 C4 C3 115.97(17) . . yes 
C5 C4 B1 122.95(18) . . yes 
C3 C4 B1 121.06(18) . . yes 
C4 C5 C8 122.89(18) . . yes 
C4 C5 S2 127.04(14) . . yes 
C8 C5 S2 110.07(15) . . yes 
C6 S2 C5 93.06(10) . . yes 
C7 C6 S2 110.69(16) . . yes 
C7 C6 Si2 125.28(16) . . yes 
S2 C6 Si2 123.94(12) . . yes 
C6 C7 C8 114.20(19) . . yes 
C6 C7 H2 122.9 . . no 
C8 C7 H2 122.9 . . no 
C9 C8 C5 121.88(18) . . yes 
C9 C8 C7 126.15(18) . . yes 
C5 C8 C7 111.97(18) . . yes 
C10 C9 C8 115.16(17) . . yes 
C10 C9 B2 123.41(19) . . yes 
C8 C9 B2 121.4(2) . . yes 
C9 C10 C3 123.17(18) . . yes 
C9 C10 S1 126.38(15) . . yes 
C3 C10 S1 110.43(16) . . yes 
C17 Si1 C11 112.08(15) . . yes 
C17 Si1 C1 109.51(12) . . yes 
C11 Si1 C1 109.43(11) . . yes 
C17 Si1 C14 109.37(12) . . yes 
C11 Si1 C14 107.88(12) . . yes 
C1 Si1 C14 108.49(11) . . yes 
C13 C11 C12 110.2(3) . . yes 
C13 C11 Si1 116.5(2) . . yes 
C12 C11 Si1 111.77(18) . . yes 
C13 C11 H3 105.8 . . no 
C12 C11 H3 105.8 . . no 
Si1 C11 H3 105.8 . . no 
C11 C12 H4 109.5 . . no 
C11 C12 H5 109.5 . . no 
H4 C12 H5 109.5 . . no 
C11 C12 H6 109.5 . . no 
H4 C12 H6 109.5 . . no 
H5 C12 H6 109.5 . . no 
C11 C13 H7 109.5 . . no 
C11 C13 H8 109.5 . . no 
H7 C13 H8 109.5 . . no 
C11 C13 H9 109.5 . . no 
H7 C13 H9 109.5 . . no 
H8 C13 H9 109.5 . . no 
C15 C14 C16 109.1(3) . . yes 
C15 C14 Si1 113.5(2) . . yes 
C16 C14 Si1 112.47(16) . . yes 
C15 C14 H10 107.1 . . no 
C16 C14 H10 107.1 . . no 
Si1 C14 H10 107.1 . . no 
C14 C15 H11 109.5 . . no 
C14 C15 H12 109.5 . . no 
H11 C15 H12 109.5 . . no 
C14 C15 H13 109.5 . . no 
H11 C15 H13 109.5 . . no 
H12 C15 H13 109.5 . . no 
C14 C16 H14 109.5 . . no 
C14 C16 H15 109.5 . . no 
H14 C16 H15 109.5 . . no 
C14 C16 H16 109.5 . . no 
H14 C16 H16 109.5 . . no 
H15 C16 H16 109.5 . . no 
C19 C17 C18 107.9(3) . . yes 
C19 C17 Si1 114.6(2) . . yes 
C18 C17 Si1 117.5(2) . . yes 
C19 C17 H17 105.2 . . no 
C18 C17 H17 105.2 . . no 
Si1 C17 H17 105.2 . . no 
C17 C18 H18 109.5 . . no 
C17 C18 H19 109.5 . . no 
H18 C18 H19 109.5 . . no 
C17 C18 H20 109.5 . . no 
H18 C18 H20 109.5 . . no 
H19 C18 H20 109.5 . . no 
C17 C19 H21 109.5 . . no 
C17 C19 H22 109.5 . . no 
H21 C19 H22 109.5 . . no 
C17 C19 H23 109.5 . . no 
H21 C19 H23 109.5 . . no 
H22 C19 H23 109.5 . . no 
C26 Si2 C6 110.38(13) . . yes 
C26 Si2 C20 115.49(15) . . yes 
C6 Si2 C20 106.11(13) . . yes 
C26 Si2 C23 108.14(16) . . yes 
C6 Si2 C23 107.92(11) . . yes 
C20 Si2 C23 108.56(15) . . yes 
C21 C20 C22 111.7(3) . . yes 
C21 C20 Si2 113.5(3) . . yes 
C22 C20 Si2 112.7(3) . . yes 
C21 C20 H24 106.1 . . no 
C22 C20 H24 106.1 . . no 
Si2 C20 H24 106.1 . . no 
C20 C21 H25 109.5 . . no 
C20 C21 H26 109.5 . . no 
H25 C21 H26 109.5 . . no 
C20 C21 H27 109.5 . . no 
H25 C21 H27 109.5 . . no 
H26 C21 H27 109.5 . . no 
C20 C22 H28 109.5 . . no 
C20 C22 H29 109.5 . . no 
H28 C22 H29 109.5 . . no 
C20 C22 H30 109.5 . . no 
H28 C22 H30 109.5 . . no 
H29 C22 H30 109.5 . . no 
C24 C23 C25 111.3(3) . . yes 
C24 C23 Si2 115.6(3) . . yes 
C25 C23 Si2 114.5(2) . . yes 
C24 C23 H31 104.7 . . no 
C25 C23 H31 104.7 . . no 
Si2 C23 H31 104.7 . . no 
C23 C24 H32 109.5 . . no 
C23 C24 H33 109.5 . . no 
H32 C24 H33 109.5 . . no 
C23 C24 H34 109.5 . . no 
H32 C24 H34 109.5 . . no 
H33 C24 H34 109.5 . . no 
C23 C25 H35 109.5 . . no 
C23 C25 H36 109.5 . . no 
H35 C25 H36 109.5 . . no 
C23 C25 H37 109.5 . . no 
H35 C25 H37 109.5 . . no 
H36 C25 H37 109.5 . . no 
C27 C26 C28 111.5(3) . . yes 
C27 C26 Si2 114.9(3) . . yes 
C28 C26 Si2 113.5(3) . . yes 
C27 C26 H38 105.3 . . no 
C28 C26 H38 105.3 . . no 
Si2 C26 H38 105.3 . . no 
C26 C27 H39 109.5 . . no 
C26 C27 H40 109.5 . . no 
H39 C27 H40 109.5 . . no 
C26 C27 H41 109.5 . . no 
H39 C27 H41 109.5 . . no 
H40 C27 H41 109.5 . . no 
C26 C28 H42 109.5 . . no 
C26 C28 H43 109.5 . . no 
H42 C28 H43 109.5 . . no 
C26 C28 H44 109.5 . . no 
H42 C28 H44 109.5 . . no 
H43 C28 H44 109.5 . . no 
O2 B1 O1 112.59(19) . . yes 
O2 B1 C4 124.8(2) . . yes 
O1 B1 C4 122.6(2) . . yes 
B1 O1 C29 108.99(19) . . yes 
O1 C29 C32 107.9(2) . . yes 
O1 C29 C31 106.2(2) . . yes 
C32 C29 C31 110.2(3) . . yes 
O1 C29 C30 101.8(2) . . yes 
C32 C29 C30 116.9(2) . . yes 
C31 C29 C30 112.8(2) . . yes 
C33 C30 O2 111.5(2) . . yes 
C33 C30 C34 109.9(3) . . yes 
O2 C30 C34 104.7(3) . . yes 
C33 C30 C29 115.8(3) . . yes 
O2 C30 C29 103.56(17) . . yes 
C34 C30 C29 110.7(2) . . yes 
B1 O2 C30 108.51(19) . . yes 
C29 C31 H45 109.5 . . no 
C29 C31 H46 109.5 . . no 
H45 C31 H46 109.5 . . no 
C29 C31 H47 109.5 . . no 
H45 C31 H47 109.5 . . no 
H46 C31 H47 109.5 . . no 
C29 C32 H48 109.5 . . no 
C29 C32 H49 109.5 . . no 
H48 C32 H49 109.5 . . no 
C29 C32 H50 109.5 . . no 
H48 C32 H50 109.5 . . no 
H49 C32 H50 109.5 . . no 
C30 C33 H51 109.5 . . no 
C30 C33 H52 109.5 . . no 
H51 C33 H52 109.5 . . no 
C30 C33 H53 109.5 . . no 
H51 C33 H53 109.5 . . no 
H52 C33 H53 109.5 . . no 
C30 C34 H54 109.5 . . no 
C30 C34 H55 109.5 . . no 
H54 C34 H55 109.5 . . no 
C30 C34 H56 109.5 . . no 
H54 C34 H56 109.5 . . no 
H55 C34 H56 109.5 . . no 
O3 B2 O4 112.5(2) . . yes 
O3 B2 C9 123.3(2) . . yes 
O4 B2 C9 124.1(2) . . yes 
B2 O3 C35 109.5(2) . . yes 
O3 C35 C37 105.5(3) . . yes 
O3 C35 C36 104.5(2) . . yes 
C37 C35 C36 115.9(5) . . yes 
O3 C35 C38 106.4(4) . . yes 
C37 C35 C38 108.3(6) . . yes 
C36 C35 C38 115.3(5) . . yes 
O4 C36 C40 107.7(4) . . yes 
O4 C36 C35 104.9(2) . . yes 
C40 C36 C35 117.7(4) . . yes 
O4 C36 C39 106.0(3) . . yes 
C40 C36 C39 107.2(5) . . yes 
C35 C36 C39 112.6(4) . . yes 
B2 O4 C36 108.4(2) . . yes 
C35 C37 H57 109.5 . . no 
C35 C37 H58 109.5 . . no 
H57 C37 H58 109.5 . . no 
C35 C37 H59 109.5 . . no 
H57 C37 H59 109.5 . . no 
H58 C37 H59 109.5 . . no 
C35 C38 H60 109.5 . . no 
C35 C38 H61 109.5 . . no 
H60 C38 H61 109.5 . . no 
C35 C38 H62 109.5 . . no 
H60 C38 H62 109.5 . . no 
H61 C38 H62 109.5 . . no 
C36 C39 H63 109.5 . . no 
C36 C39 H64 109.5 . . no 
H63 C39 H64 109.5 . . no 
C36 C39 H65 109.5 . . no 
H63 C39 H65 109.5 . . no 
H64 C39 H65 109.5 . . no 
C36 C40 H66 109.5 . . no 
C36 C40 H67 109.5 . . no 
H66 C40 H67 109.5 . . no 
C36 C40 H68 109.5 . . no 
H66 C40 H68 109.5 . . no 
H67 C40 H68 109.5 . . no 
 
loop_ 
 _geom_torsion_atom_site_label_1 
 _geom_torsion_atom_site_label_2 
 _geom_torsion_atom_site_label_3 
 _geom_torsion_atom_site_label_4 
 _geom_torsion 
 _geom_torsion_site_symmetry_1 
 _geom_torsion_site_symmetry_2 
 _geom_torsion_site_symmetry_3 
 _geom_torsion_site_symmetry_4 
 _geom_torsion_publ_flag 
C10 S1 C1 C2 1.55(17) . . . . yes 
C10 S1 C1 Si1 178.80(14) . . . . yes 
S1 C1 C2 C3 -1.5(2) . . . . yes 
Si1 C1 C2 C3 -178.77(15) . . . . yes 
C1 C2 C3 C4 -176.58(19) . . . . yes 
C1 C2 C3 C10 0.6(3) . . . . yes 
C10 C3 C4 C5 0.6(3) . . . . yes 
C2 C3 C4 C5 177.56(18) . . . . yes 
C10 C3 C4 B1 179.04(18) . . . . yes 
C2 C3 C4 B1 -4.0(3) . . . . yes 
C3 C4 C5 C8 -0.4(3) . . . . yes 
B1 C4 C5 C8 -178.80(18) . . . . yes 
C3 C4 C5 S2 179.02(14) . . . . yes 
B1 C4 C5 S2 0.6(3) . . . . yes 
C4 C5 S2 C6 -179.70(17) . . . . yes 
C8 C5 S2 C6 -0.19(14) . . . . yes 
C5 S2 C6 C7 0.42(16) . . . . yes 
C5 S2 C6 Si2 177.22(13) . . . . yes 
S2 C6 C7 C8 -0.5(2) . . . . yes 
Si2 C6 C7 C8 -177.29(14) . . . . yes 
C4 C5 C8 C9 -0.2(3) . . . . yes 
S2 C5 C8 C9 -179.71(15) . . . . yes 
C4 C5 C8 C7 179.45(17) . . . . yes 
S2 C5 C8 C7 -0.1(2) . . . . yes 
C6 C7 C8 C9 -179.98(18) . . . . yes 
C6 C7 C8 C5 0.4(2) . . . . yes 
C5 C8 C9 C10 0.6(3) . . . . yes 
C7 C8 C9 C10 -179.02(18) . . . . yes 
C5 C8 C9 B2 -178.96(18) . . . . yes 
C7 C8 C9 B2 1.5(3) . . . . yes 
C8 C9 C10 C3 -0.3(3) . . . . yes 
B2 C9 C10 C3 179.17(19) . . . . yes 
C8 C9 C10 S1 -178.33(15) . . . . yes 
B2 C9 C10 S1 1.2(3) . . . . yes 
C4 C3 C10 C9 -0.3(3) . . . . yes 
C2 C3 C10 C9 -177.65(18) . . . . yes 
C4 C3 C10 S1 178.00(15) . . . . yes 
C2 C3 C10 S1 0.6(2) . . . . yes 
C1 S1 C10 C9 176.97(19) . . . . yes 
C1 S1 C10 C3 -1.23(16) . . . . yes 
C2 C1 Si1 C17 -26.5(2) . . . . yes 
S1 C1 Si1 C17 156.64(14) . . . . yes 
C2 C1 Si1 C11 -149.7(2) . . . . yes 
S1 C1 Si1 C11 33.41(19) . . . . yes 
C2 C1 Si1 C14 92.8(2) . . . . yes 
S1 C1 Si1 C14 -84.06(16) . . . . yes 
C17 Si1 C11 C13 -69.4(3) . . . . yes 
C1 Si1 C11 C13 52.3(3) . . . . yes 
C14 Si1 C11 C13 170.2(3) . . . . yes 
C17 Si1 C11 C12 58.5(3) . . . . yes 
C1 Si1 C11 C12 -179.8(2) . . . . yes 
C14 Si1 C11 C12 -61.9(3) . . . . yes 
C17 Si1 C14 C15 74.0(3) . . . . yes 
C11 Si1 C14 C15 -163.8(2) . . . . yes 
C1 Si1 C14 C15 -45.4(2) . . . . yes 
C17 Si1 C14 C16 -161.5(3) . . . . yes 
C11 Si1 C14 C16 -39.3(3) . . . . yes 
C1 Si1 C14 C16 79.1(3) . . . . yes 
C11 Si1 C17 C19 71.1(3) . . . . yes 
C1 Si1 C17 C19 -50.5(3) . . . . yes 
C14 Si1 C17 C19 -169.3(2) . . . . yes 
C11 Si1 C17 C18 -160.5(2) . . . . yes 
C1 Si1 C17 C18 77.9(3) . . . . yes 
C14 Si1 C17 C18 -40.9(3) . . . . yes 
C7 C6 Si2 C26 -16.3(2) . . . . yes 
S2 C6 Si2 C26 167.37(17) . . . . yes 
C7 C6 Si2 C20 -142.12(19) . . . . yes 
S2 C6 Si2 C20 41.55(16) . . . . yes 
C7 C6 Si2 C23 101.7(2) . . . . yes 
S2 C6 Si2 C23 -74.65(17) . . . . yes 
C26 Si2 C20 C21 -63.2(3) . . . . yes 
C6 Si2 C20 C21 59.5(3) . . . . yes 
C23 Si2 C20 C21 175.2(3) . . . . yes 
C26 Si2 C20 C22 65.1(3) . . . . yes 
C6 Si2 C20 C22 -172.30(19) . . . . yes 
C23 Si2 C20 C22 -56.5(2) . . . . yes 
C26 Si2 C23 C24 -176.6(3) . . . . yes 
C6 Si2 C23 C24 64.0(3) . . . . yes 
C20 Si2 C23 C24 -50.6(3) . . . . yes 
C26 Si2 C23 C25 -45.3(3) . . . . yes 
C6 Si2 C23 C25 -164.7(3) . . . . yes 
C20 Si2 C23 C25 80.7(3) . . . . yes 
C6 Si2 C26 C27 -59.8(3) . . . . yes 
C20 Si2 C26 C27 60.6(3) . . . . yes 
C23 Si2 C26 C27 -177.6(3) . . . . yes 
C6 Si2 C26 C28 70.2(3) . . . . yes 
C20 Si2 C26 C28 -169.4(3) . . . . yes 
C23 Si2 C26 C28 -47.6(3) . . . . yes 
C5 C4 B1 O2 -9.3(3) . . . . yes 
C3 C4 B1 O2 172.4(2) . . . . yes 
C5 C4 B1 O1 170.4(2) . . . . yes 
C3 C4 B1 O1 -7.9(3) . . . . yes 
O2 B1 O1 C29 -8.1(3) . . . . yes 
C4 B1 O1 C29 172.2(2) . . . . yes 
B1 O1 C29 C32 141.5(3) . . . . yes 
B1 O1 C29 C31 -100.4(3) . . . . yes 
B1 O1 C29 C30 17.8(2) . . . . yes 
O1 C29 C30 C33 -143.0(2) . . . . yes 
C32 C29 C30 C33 99.7(3) . . . . yes 
C31 C29 C30 C33 -29.6(3) . . . . yes 
O1 C29 C30 O2 -20.6(2) . . . . yes 
C32 C29 C30 O2 -138.0(3) . . . . yes 
C31 C29 C30 O2 92.7(3) . . . . yes 
O1 C29 C30 C34 91.1(3) . . . . yes 
C32 C29 C30 C34 -26.2(4) . . . . yes 
C31 C29 C30 C34 -155.5(3) . . . . yes 
O1 B1 O2 C30 -6.6(3) . . . . yes 
C4 B1 O2 C30 173.1(2) . . . . yes 
C33 C30 O2 B1 142.3(3) . . . . yes 
C34 C30 O2 B1 -98.9(3) . . . . yes 
C29 C30 O2 B1 17.2(3) . . . . yes 
C10 C9 B2 O3 -176.2(2) . . . . yes 
C8 C9 B2 O3 3.3(3) . . . . yes 
C10 C9 B2 O4 5.4(4) . . . . yes 
C8 C9 B2 O4 -175.2(2) . . . . yes 
O4 B2 O3 C35 -1.5(3) . . . . yes 
C9 B2 O3 C35 179.9(2) . . . . yes 
B2 O3 C35 C37 121.7(4) . . . . yes 
B2 O3 C35 C36 -1.0(4) . . . . yes 
B2 O3 C35 C38 -123.4(6) . . . . yes 
O3 C35 C36 O4 2.9(4) . . . . yes 
C37 C35 C36 O4 -112.8(4) . . . . yes 
C38 C35 C36 O4 119.3(5) . . . . yes 
O3 C35 C36 C40 -116.8(5) . . . . yes 
C37 C35 C36 C40 127.6(5) . . . . yes 
C38 C35 C36 C40 -0.4(7) . . . . yes 
O3 C35 C36 C39 117.8(3) . . . . yes 
C37 C35 C36 C39 2.1(5) . . . . yes 
C38 C35 C36 C39 -125.8(5) . . . . yes 
O3 B2 O4 C36 3.5(3) . . . . yes 
C9 B2 O4 C36 -177.9(2) . . . . yes 
C40 C36 O4 B2 122.3(5) . . . . yes 
C35 C36 O4 B2 -3.9(3) . . . . yes 
C39 C36 O4 B2 -123.2(4) . . . . yes 
 
_diffrn_measured_fraction_theta_max    0.980 
_diffrn_reflns_theta_full              27.48 
_diffrn_measured_fraction_theta_full   0.980 
_refine_diff_density_max    0.692 
_refine_diff_density_min   -0.351 
_refine_diff_density_rms    0.060 

#--END
 
data_TIPS-Bpin-BDS 
 
_audit_creation_method            SHELXL-97 
_chemical_name_systematic 
; 
 TIPS-Bpin-BDS  
; 
_chemical_name_common             TIPS-Bpin-BDS  
_chemical_melting_point           ? 
_chemical_formula_moiety          'C40 H68 B2 O4 Se2 Si2'  
_chemical_formula_sum 
 'C40 H68 B2 O4 Se2 Si2' 
_chemical_formula_weight          848.66 
 
loop_ 
 _atom_type_symbol 
 _atom_type_description 
 _atom_type_scat_dispersion_real 
 _atom_type_scat_dispersion_imag 
 _atom_type_scat_source 
 'C'  'C'   0.0033   0.0016 
 'International Tables Vol C Tables 4.2.6.8 and 6.1.1.4' 
 'H'  'H'   0.0000   0.0000 
 'International Tables Vol C Tables 4.2.6.8 and 6.1.1.4' 
 'B'  'B'   0.0013   0.0007 
 'International Tables Vol C Tables 4.2.6.8 and 6.1.1.4' 
 'O'  'O'   0.0106   0.0060 
 'International Tables Vol C Tables 4.2.6.8 and 6.1.1.4' 
 'Se'  'Se'  -0.0929   2.2259 
 'International Tables Vol C Tables 4.2.6.8 and 6.1.1.4' 
 'Si'  'Si'   0.0817   0.0704 
 'International Tables Vol C Tables 4.2.6.8 and 6.1.1.4' 
 
_symmetry_cell_setting            monoclinic 
_symmetry_space_group_name_H-M    'P21/n' 
 
loop_ 
 _symmetry_equiv_pos_as_xyz 
 'x, y, z' 
 '-x+1/2, y+1/2, -z+1/2' 
 '-x, -y, -z' 
 'x-1/2, -y-1/2, z-1/2' 
 
_cell_length_a                    12.433(8) 
_cell_length_b                    13.331(8) 
_cell_length_c                    14.725(10) 
_cell_angle_alpha                 90.00 
_cell_angle_beta                  113.371(2) 
_cell_angle_gamma                 90.00 
_cell_volume                      2240(3) 
_cell_formula_units_Z             2 
_cell_measurement_temperature     293(2) 
_cell_measurement_reflns_used     6234 
_cell_measurement_theta_min       3.0 
_cell_measurement_theta_max       27.5 
 
_exptl_crystal_description        'Block' 
_exptl_crystal_colour             'Colorless' 
_exptl_crystal_size_max           0.300 
_exptl_crystal_size_mid           0.300 
_exptl_crystal_size_min           0.300 
_exptl_crystal_density_meas       ? 
_exptl_crystal_density_diffrn     1.258 
_exptl_crystal_density_method     'not measured' 
_exptl_crystal_F_000              892 
_exptl_absorpt_coefficient_mu     1.739 
_exptl_absorpt_correction_type    none 
_exptl_absorpt_correction_T_min   ? 
_exptl_absorpt_correction_T_max   ? 
_exptl_absorpt_process_details    ? 
 
_exptl_special_details 
; 
 ? 
; 
 
_diffrn_ambient_temperature       293(2) 
_diffrn_radiation_wavelength      0.71070 
_diffrn_radiation_type            MoK\a 
_diffrn_radiation_source          'fine-focus sealed tube' 
_diffrn_radiation_monochromator   graphite 
_diffrn_measurement_device_type   'Rigaku/MSC Mercury CCD' 
_diffrn_measurement_method        \w
_diffrn_detector_area_resol_mean  14.71 
_diffrn_standards_number          16353
_diffrn_standards_interval_count  ? 
_diffrn_standards_interval_time   ? 
_diffrn_standards_decay_%         ? 
_diffrn_reflns_number             16035 
_diffrn_reflns_av_R_equivalents   0.0714 
_diffrn_reflns_av_sigmaI/netI     0.0660 
_diffrn_reflns_limit_h_min        -16 
_diffrn_reflns_limit_h_max        10 
_diffrn_reflns_limit_k_min        -16 
_diffrn_reflns_limit_k_max        17 
_diffrn_reflns_limit_l_min        -18 
_diffrn_reflns_limit_l_max        19 
_diffrn_reflns_theta_min          3.01 
_diffrn_reflns_theta_max          27.48 
_reflns_number_total              4951 
_reflns_number_gt                 3822 
_reflns_threshold_expression      >2sigma(I) 
 
_computing_data_collection        ? 
_computing_cell_refinement        ? 
_computing_data_reduction         ? 
_computing_structure_solution     'SHELXS-97 (Sheldrick, 1990)' 
_computing_structure_refinement   'SHELXL-97 (Sheldrick, 1997)' 
_computing_molecular_graphics     ? 
_computing_publication_material   ? 
 
_refine_special_details 
; 
 Refinement of F^2^ against ALL reflections.  The weighted R-factor wR and 
 goodness of fit S are based on F^2^, conventional R-factors R are based 
 on F, with F set to zero for negative F^2^. The threshold expression of 
 F^2^ > 2sigma(F^2^) is used only for calculating R-factors(gt) etc. and is 
 not relevant to the choice of reflections for refinement.  R-factors based 
 on F^2^ are statistically about twice as large as those based on F, and R- 
 factors based on ALL data will be even larger. 
; 
 
_refine_ls_structure_factor_coef  Fsqd  
_refine_ls_matrix_type            full 
_refine_ls_weighting_scheme       calc  
_refine_ls_weighting_details 
 'calc w=1/[\s^2^(Fo^2^)+(0.1315P)^2^+0.0000P] where P=(Fo^2^+2Fc^2^)/3' 
_atom_sites_solution_primary      direct 
_atom_sites_solution_secondary    difmap 
_atom_sites_solution_hydrogens    geom 
_refine_ls_hydrogen_treatment     noref 
_refine_ls_extinction_method      none 
_refine_ls_extinction_coef        ? 
_refine_ls_number_reflns          4951 
_refine_ls_number_parameters      226 
_refine_ls_number_restraints      0 
_refine_ls_R_factor_all           0.0724 
_refine_ls_R_factor_gt            0.0644 
_refine_ls_wR_factor_ref          0.1974 
_refine_ls_wR_factor_gt           0.1864 
_refine_ls_goodness_of_fit_ref    1.037 
_refine_ls_restrained_S_all       1.037 
_refine_ls_shift/su_max           0.000 
_refine_ls_shift/su_mean          0.000 
 
loop_ 
 _atom_site_label 
 _atom_site_type_symbol 
 _atom_site_fract_x 
 _atom_site_fract_y 
 _atom_site_fract_z 
 _atom_site_U_iso_or_equiv 
 _atom_site_adp_type 
 _atom_site_occupancy 
 _atom_site_symmetry_multiplicity 
 _atom_site_calc_flag 
 _atom_site_refinement_flags 
 _atom_site_disorder_assembly 
 _atom_site_disorder_group 
Se1 Se 0.25628(3) 0.12094(2) 0.45163(3) 0.05127(19) Uani 1 1 d . . . 
Si1 Si 0.23473(8) 0.32354(7) 0.31291(7) 0.0540(3) Uani 1 1 d . . . 
O1 O 0.2299(2) -0.0566(2) 0.5637(2) 0.0737(9) Uani 1 1 d . . . 
O2 O 0.3669(3) -0.1688(2) 0.6480(3) 0.0835(10) Uani 1 1 d . . . 
C1 C 0.4238(2) -0.0439(2) 0.5421(2) 0.0414(6) Uani 1 1 d . . . 
C2 C 0.3937(2) 0.0439(2) 0.4844(2) 0.0409(6) Uani 1 1 d . . . 
C3 C 0.3158(3) 0.2098(2) 0.3825(2) 0.0490(7) Uani 1 1 d . . . 
C4 C 0.4197(3) 0.1781(2) 0.3876(2) 0.0468(7) Uani 1 1 d . . . 
C5 C 0.4679(3) 0.0868(2) 0.4431(2) 0.0413(6) Uani 1 1 d . . . 
C6 C 0.1811(4) -0.1105(3) 0.6241(4) 0.0746(13) Uani 1 1 d . . . 
C7 C 0.2977(8) -0.2283(8) 0.7694(6) 0.161(4) Uani 1 1 d . . . 
C8 C 0.2214(7) -0.2942(5) 0.6063(8) 0.136(3) Uani 1 1 d . . . 
C9 C 0.2636(4) -0.1980(3) 0.6653(4) 0.0710(11) Uani 1 1 d . . . 
C10 C 0.1851(10) -0.0388(6) 0.7031(7) 0.155(4) Uani 1 1 d . . . 
C11 C 0.0572(6) -0.1352(7) 0.5635(8) 0.165(5) Uani 1 1 d . . . 
C12 C 0.3394(5) 0.4100(4) 0.2873(4) 0.0820(14) Uani 1 1 d . . . 
C13 C 0.3799(7) 0.3846(5) 0.2078(7) 0.119(3) Uani 1 1 d . . . 
C14 C 0.4470(6) 0.4366(5) 0.3777(6) 0.124(3) Uani 1 1 d . . . 
C15 C 0.1565(6) 0.3833(4) 0.3812(5) 0.101(2) Uani 1 1 d . . . 
C16 C 0.2182(9) 0.4082(7) 0.4854(5) 0.153(4) Uani 1 1 d . . . 
C17 C 0.0792(9) 0.4739(7) 0.3244(7) 0.187(5) Uani 1 1 d . . . 
C18 C 0.1222(5) 0.2822(4) 0.1874(3) 0.0871(15) Uani 1 1 d . . . 
C20 C 0.0148(5) 0.2354(6) 0.1907(6) 0.145(3) Uani 1 1 d . . . 
C21 C 0.1696(9) 0.2082(6) 0.1340(5) 0.137(3) Uani 1 1 d . . . 
B8 B 0.3398(3) -0.0914(3) 0.5846(3) 0.0478(8) Uani 1 1 d . . . 
H1 H 0.4612 0.2140 0.3549 0.057 Uiso 1 1 d . . . 
H2 H 0.2330 -0.2470 0.7823 0.197 Uiso 1 1 d . . . 
H3 H 0.3534 -0.2822 0.7856 0.197 Uiso 1 1 d . . . 
H4 H 0.3370 -0.1722 0.8122 0.197 Uiso 1 1 d . . . 
H5 H 0.1523 -0.3175 0.6118 0.161 Uiso 1 1 d . . . 
H6 H 0.2022 -0.2799 0.5366 0.161 Uiso 1 1 d . . . 
H7 H 0.2798 -0.3437 0.6269 0.161 Uiso 1 1 d . . . 
H8 H 0.2689 -0.0201 0.7423 0.173 Uiso 1 1 d . . . 
H9 H 0.1453 0.0210 0.6779 0.173 Uiso 1 1 d . . . 
H10 H 0.1588 -0.0687 0.7487 0.173 Uiso 1 1 d . . . 
H11 H 0.0120 -0.0760 0.5363 0.198 Uiso 1 1 d . . . 
H12 H 0.0517 -0.1763 0.5061 0.198 Uiso 1 1 d . . . 
H13 H 0.0222 -0.1719 0.5989 0.198 Uiso 1 1 d . . . 
H14 H 0.4296 0.3281 0.2259 0.134 Uiso 1 1 d . . . 
H15 H 0.3119 0.3680 0.1481 0.134 Uiso 1 1 d . . . 
H16 H 0.4183 0.4397 0.1934 0.134 Uiso 1 1 d . . . 
H17 H 0.5003 0.3804 0.3974 0.145 Uiso 1 1 d . . . 
H18 H 0.4889 0.4917 0.3644 0.145 Uiso 1 1 d . . . 
H19 H 0.4282 0.4545 0.4321 0.145 Uiso 1 1 d . . . 
H20 H 0.2603 0.3502 0.5191 0.184 Uiso 1 1 d . . . 
H21 H 0.2674 0.4616 0.4914 0.184 Uiso 1 1 d . . . 
H22 H 0.1614 0.4244 0.5126 0.184 Uiso 1 1 d . . . 
H23 H 0.1312 0.5304 0.3311 0.193 Uiso 1 1 d . . . 
H24 H 0.0406 0.4586 0.2568 0.193 Uiso 1 1 d . . . 
H25 H 0.0250 0.4925 0.3516 0.193 Uiso 1 1 d . . . 
H26 H -0.0190 0.2800 0.2244 0.174 Uiso 1 1 d . . . 
H27 H -0.0421 0.2208 0.1277 0.174 Uiso 1 1 d . . . 
H28 H 0.0355 0.1744 0.2293 0.174 Uiso 1 1 d . . . 
H29 H 0.1891 0.1457 0.1709 0.158 Uiso 1 1 d . . . 
H30 H 0.1115 0.1925 0.0695 0.158 Uiso 1 1 d . . . 
H31 H 0.2371 0.2330 0.1281 0.158 Uiso 1 1 d . . . 
H32 H 0.0979 0.3340 0.3809 0.131 Uiso 1 1 d . . . 
H33 H 0.0965 0.3397 0.1452 0.102 Uiso 1 1 d . . . 
H34 H 0.2981 0.4726 0.2676 0.098 Uiso 1 1 d . . . 
 
loop_ 
 _atom_site_aniso_label 
 _atom_site_aniso_U_11 
 _atom_site_aniso_U_22 
 _atom_site_aniso_U_33 
 _atom_site_aniso_U_23 
 _atom_site_aniso_U_13 
 _atom_site_aniso_U_12 
Se1 0.0414(3) 0.0500(3) 0.0653(3) 0.01465(13) 0.02422(18) 0.00708(11) 
Si1 0.0478(5) 0.0463(5) 0.0619(5) 0.0143(4) 0.0156(4) 0.0070(4) 
O1 0.0563(15) 0.0761(19) 0.102(2) 0.0418(16) 0.0459(15) 0.0141(13) 
O2 0.0739(19) 0.080(2) 0.121(3) 0.0542(19) 0.0647(19) 0.0250(15) 
C1 0.0398(14) 0.0413(15) 0.0451(14) 0.0057(11) 0.0188(11) 0.0003(11) 
C2 0.0363(13) 0.0412(14) 0.0445(14) 0.0043(11) 0.0153(11) -0.0007(11) 
C3 0.0473(16) 0.0433(16) 0.0553(16) 0.0100(13) 0.0192(13) 0.0023(12) 
C4 0.0428(15) 0.0446(16) 0.0522(16) 0.0136(12) 0.0180(13) 0.0025(12) 
C5 0.0424(15) 0.0398(14) 0.0416(13) 0.0052(11) 0.0168(11) 0.0001(12) 
C6 0.065(3) 0.071(3) 0.109(4) 0.027(2) 0.057(3) 0.0086(18) 
C7 0.151(7) 0.229(9) 0.137(6) 0.114(6) 0.095(5) 0.089(7) 
C8 0.146(6) 0.070(4) 0.225(9) -0.012(4) 0.107(6) -0.018(4) 
C9 0.068(2) 0.072(3) 0.092(3) 0.031(2) 0.052(2) 0.0066(19) 
C10 0.246(10) 0.107(5) 0.190(8) 0.027(5) 0.169(8) 0.056(6) 
C11 0.060(3) 0.211(9) 0.209(9) 0.122(7) 0.039(5) -0.007(4) 
C12 0.089(3) 0.062(2) 0.100(3) 0.027(2) 0.042(3) 0.010(2) 
C13 0.094(5) 0.124(6) 0.159(7) 0.067(5) 0.070(5) 0.021(3) 
C14 0.090(4) 0.088(4) 0.162(6) -0.001(4) 0.016(4) -0.029(3) 
C15 0.123(5) 0.097(4) 0.099(4) 0.034(3) 0.063(4) 0.051(3) 
C16 0.191(9) 0.154(6) 0.090(4) -0.015(4) 0.030(5) 0.093(6) 
C17 0.246(10) 0.202(8) 0.182(7) 0.104(7) 0.157(8) 0.168(8) 
C18 0.081(3) 0.089(3) 0.073(3) 0.025(2) 0.011(2) -0.002(3) 
C20 0.087(4) 0.173(7) 0.135(5) 0.013(5) 0.003(4) -0.061(5) 
C21 0.200(8) 0.105(5) 0.086(4) -0.023(3) 0.035(4) -0.016(5) 
B8 0.0477(19) 0.0447(17) 0.0558(19) 0.0077(15) 0.0256(16) 0.0003(15) 
 
_geom_special_details 
; 
 All esds (except the esd in the dihedral angle between two l.s. planes) 
 are estimated using the full covariance matrix.  The cell esds are taken 
 into account individually in the estimation of esds in distances, angles 
 and torsion angles; correlations between esds in cell parameters are only 
 used when they are defined by crystal symmetry.  An approximate (isotropic) 
 treatment of cell esds is used for estimating esds involving l.s. planes. 
; 
 
loop_ 
 _geom_bond_atom_site_label_1 
 _geom_bond_atom_site_label_2 
 _geom_bond_distance 
 _geom_bond_site_symmetry_2 
 _geom_bond_publ_flag 
Se1 C2 1.885(3) . yes 
Se1 C3 1.894(3) . yes 
Si1 C15 1.835(6) . yes 
Si1 C3 1.882(3) . yes 
Si1 C12 1.885(5) . yes 
Si1 C18 1.904(5) . yes 
O1 B8 1.358(5) . yes 
O1 C6 1.451(5) . yes 
O2 B8 1.342(5) . yes 
O2 C9 1.458(5) . yes 
C1 C5 1.399(4) 3_656 yes 
C1 C2 1.408(4) . yes 
C1 B8 1.550(5) . yes 
C2 C5 1.412(4) . yes 
C3 C4 1.332(5) . yes 
C4 C5 1.456(4) . yes 
C5 C1 1.399(4) 3_656 yes 
C6 C11 1.479(9) . yes 
C6 C10 1.490(10) . yes 
C6 C9 1.513(6) . yes 
C7 C9 1.475(8) . yes 
C8 C9 1.520(9) . yes 
C12 C13 1.485(10) . yes 
C12 C14 1.509(8) . yes 
C15 C16 1.456(10) . yes 
C15 C17 1.563(8) . yes 
C18 C20 1.491(8) . yes 
C18 C21 1.519(10) . yes 
 
loop_ 
 _geom_angle_atom_site_label_1 
 _geom_angle_atom_site_label_2 
 _geom_angle_atom_site_label_3 
 _geom_angle 
 _geom_angle_site_symmetry_1 
 _geom_angle_site_symmetry_3 
 _geom_angle_publ_flag 
C2 Se1 C3 88.32(14) . . yes 
C15 Si1 C3 109.7(2) . . yes 
C15 Si1 C12 113.7(3) . . yes 
C3 Si1 C12 109.76(19) . . yes 
C15 Si1 C18 108.2(3) . . yes 
C3 Si1 C18 108.87(19) . . yes 
C12 Si1 C18 106.4(2) . . yes 
B8 O1 C6 108.6(3) . . yes 
B8 O2 C9 109.4(3) . . yes 
C5 C1 C2 116.3(3) 3_656 . yes 
C5 C1 B8 122.1(3) 3_656 . yes 
C2 C1 B8 121.6(3) . . yes 
C1 C2 C5 122.3(3) . . yes 
C1 C2 Se1 127.2(2) . . yes 
C5 C2 Se1 110.5(2) . . yes 
C4 C3 Si1 125.8(3) . . yes 
C4 C3 Se1 110.3(2) . . yes 
Si1 C3 Se1 123.9(2) . . yes 
C3 C4 C5 118.1(3) . . yes 
C1 C5 C2 121.4(3) 3_656 . yes 
C1 C5 C4 125.9(3) 3_656 . yes 
C2 C5 C4 112.7(3) . . yes 
O1 C6 C11 109.2(5) . . yes 
O1 C6 C10 105.6(5) . . yes 
C11 C6 C10 108.6(7) . . yes 
O1 C6 C9 104.3(3) . . yes 
C11 C6 C9 116.6(5) . . yes 
C10 C6 C9 112.0(6) . . yes 
O2 C9 C7 110.2(5) . . yes 
O2 C9 C6 103.1(3) . . yes 
C7 C9 C6 119.8(5) . . yes 
O2 C9 C8 104.7(5) . . yes 
C7 C9 C8 104.8(6) . . yes 
C6 C9 C8 113.3(5) . . yes 
C13 C12 C14 106.9(6) . . yes 
C13 C12 Si1 119.7(5) . . yes 
C14 C12 Si1 114.1(4) . . yes 
C16 C15 C17 110.0(6) . . yes 
C16 C15 Si1 120.3(5) . . yes 
C17 C15 Si1 112.9(4) . . yes 
C20 C18 C21 106.4(6) . . yes 
C20 C18 Si1 114.3(4) . . yes 
C21 C18 Si1 113.8(4) . . yes 
O2 B8 O1 111.9(3) . . yes 
O2 B8 C1 124.8(3) . . yes 
O1 B8 C1 123.2(3) . . yes 
 
loop_ 
 _geom_torsion_atom_site_label_1 
 _geom_torsion_atom_site_label_2 
 _geom_torsion_atom_site_label_3 
 _geom_torsion_atom_site_label_4 
 _geom_torsion 
 _geom_torsion_site_symmetry_1 
 _geom_torsion_site_symmetry_2 
 _geom_torsion_site_symmetry_3 
 _geom_torsion_site_symmetry_4 
 _geom_torsion_publ_flag 
C5 C1 C2 C5 0.1(5) 3_656 . . . yes 
B8 C1 C2 C5 -178.5(3) . . . . yes 
C5 C1 C2 Se1 -179.2(2) 3_656 . . . yes 
B8 C1 C2 Se1 2.2(4) . . . . yes 
C3 Se1 C2 C1 178.8(3) . . . . yes 
C3 Se1 C2 C5 -0.6(2) . . . . yes 
C15 Si1 C3 C4 -144.5(4) . . . . yes 
C12 Si1 C3 C4 -18.9(4) . . . . yes 
C18 Si1 C3 C4 97.2(4) . . . . yes 
C15 Si1 C3 Se1 38.0(3) . . . . yes 
C12 Si1 C3 Se1 163.6(3) . . . . yes 
C18 Si1 C3 Se1 -80.3(3) . . . . yes 
C2 Se1 C3 C4 0.8(3) . . . . yes 
C2 Se1 C3 Si1 178.6(2) . . . . yes 
Si1 C3 C4 C5 -178.5(2) . . . . yes 
Se1 C3 C4 C5 -0.8(4) . . . . yes 
C1 C2 C5 C1 -0.1(5) . . . 3_656 yes 
Se1 C2 C5 C1 179.3(2) . . . 3_656 yes 
C1 C2 C5 C4 -179.1(3) . . . . yes 
Se1 C2 C5 C4 0.3(3) . . . . yes 
C3 C4 C5 C1 -178.7(3) . . . 3_656 yes 
C3 C4 C5 C2 0.3(4) . . . . yes 
B8 O1 C6 C11 -138.4(6) . . . . yes 
B8 O1 C6 C10 105.0(6) . . . . yes 
B8 O1 C6 C9 -13.1(5) . . . . yes 
B8 O2 C9 C7 -143.1(6) . . . . yes 
B8 O2 C9 C6 -14.1(5) . . . . yes 
B8 O2 C9 C8 104.7(5) . . . . yes 
O1 C6 C9 O2 16.0(5) . . . . yes 
C11 C6 C9 O2 136.4(6) . . . . yes 
C10 C6 C9 O2 -97.7(6) . . . . yes 
O1 C6 C9 C7 138.8(6) . . . . yes 
C11 C6 C9 C7 -100.7(8) . . . . yes 
C10 C6 C9 C7 25.1(9) . . . . yes 
O1 C6 C9 C8 -96.6(5) . . . . yes 
C11 C6 C9 C8 23.8(8) . . . . yes 
C10 C6 C9 C8 149.7(6) . . . . yes 
C15 Si1 C12 C13 -160.7(4) . . . . yes 
C3 Si1 C12 C13 76.0(5) . . . . yes 
C18 Si1 C12 C13 -41.7(5) . . . . yes 
C15 Si1 C12 C14 71.0(5) . . . . yes 
C3 Si1 C12 C14 -52.3(5) . . . . yes 
C18 Si1 C12 C14 -170.0(5) . . . . yes 
C3 Si1 C15 C16 51.7(7) . . . . yes 
C12 Si1 C15 C16 -71.7(7) . . . . yes 
C18 Si1 C15 C16 170.3(6) . . . . yes 
C3 Si1 C15 C17 -175.7(6) . . . . yes 
C12 Si1 C15 C17 61.0(7) . . . . yes 
C18 Si1 C15 C17 -57.0(7) . . . . yes 
C15 Si1 C18 C20 -42.2(5) . . . . yes 
C3 Si1 C18 C20 76.9(5) . . . . yes 
C12 Si1 C18 C20 -164.8(5) . . . . yes 
C15 Si1 C18 C21 -164.8(4) . . . . yes 
C3 Si1 C18 C21 -45.6(5) . . . . yes 
C12 Si1 C18 C21 72.6(5) . . . . yes 
C9 O2 B8 O1 6.4(6) . . . . yes 
C9 O2 B8 C1 -175.4(4) . . . . yes 
C6 O1 B8 O2 4.7(5) . . . . yes 
C6 O1 B8 C1 -173.5(4) . . . . yes 
C5 C1 B8 O2 8.5(6) 3_656 . . . yes 
C2 C1 B8 O2 -173.0(4) . . . . yes 
C5 C1 B8 O1 -173.6(3) 3_656 . . . yes 
C2 C1 B8 O1 4.9(5) . . . . yes 
 
_diffrn_measured_fraction_theta_max    0.962 
_diffrn_reflns_theta_full              27.48 
_diffrn_measured_fraction_theta_full   0.962 
_refine_diff_density_max    1.605 
_refine_diff_density_min   -1.115 
_refine_diff_density_rms    0.092 
